# Supplementary material for: Rewilding the world's large carnivores
Source: R Soc Open Sci. 2018 Mar 14;5(3):172235. doi: 10.1098/rsos.172235 (PMC5882739; doi:10.1098/rsos.172235)
Supplement: SI_tables (Additional Supplementary Tables) [file rsos172235supp2.xlsx]

## Sheet: Table S1. photo credits
Scientific Name	Common Name	Credit	License	URL
Canis lupus	Gray wolf	John and Karen Hollingsworth/USFWS	Attribution 2.0 Generic (CC BY 2.0)	https://www.flickr.com/photos/usfwsendsp/5039508124
Canis lupus dingo	Dingo	Paul Balfe	Attribution 2.0 Generic (CC BY 2.0)	https://www.flickr.com/photos/paul_e_balfe/34650957965
Canis rufus	Red wolf	B. Crawford/USFWS 2003	Attribution 2.0 Generic (CC BY 2.0)	https://www.flickr.com/photos/trackthepack/6189682486
Canis simensis	Ethiopian wolf	Stuart Orford	Attribution-ShareAlike 2.0 Generic (CC BY-SA 2.0)	https://www.flickr.com/photos/sjorford/10756837095
Cuon alpinus	Dhole	Ozzy Delaney	Attribution 2.0 Generic (CC BY 2.0)	https://www.flickr.com/photos/24931020@N02/15759473602
Lycaon pictus	African wild dog	Derek Keats	Attribution 2.0 Generic (CC BY 2.0)	https://www.flickr.com/photos/dkeats/32318497280
Acinonyx jubatus	Cheetah	Thomas Hawk	Attribution-NonCommercial 2.0 Generic (CC BY-NC 2.0)	https://www.flickr.com/photos/thomashawk/5190369647
Lynx lynx	Eurasian lynx	dogrando	Attribution-ShareAlike 2.0 Generic (CC BY-SA 2.0)	https://www.flickr.com/photos/dogrando/4921196613
Neofelis diardi	Sunda clouded leopard	Spencer Wright	Attribution 2.0 Generic (CC BY 2.0)	https://www.flickr.com/photos/spencer77/4903773455
Neofelis nebulosa	Clouded leopard	Charles Barilleaux	Attribution 2.0 Generic (CC BY 2.0)	https://www.flickr.com/photos/bontempscharly/7750524126
Panthera leo	Lion	Mathias Appel	CC0 1.0 Universal (CC0 1.0) Public Domain Dedication	https://www.flickr.com/photos/mathiasappel/26260010225
Panthera onca	Jaguar	Eric Kilby	Attribution-ShareAlike 2.0 Generic (CC BY-SA 2.0)	https://www.flickr.com/photos/ekilby/5255797177
Panthera pardus	Leopard	Hamish Irvine	Attribution-NonCommercial 2.0 Generic (CC BY-NC 2.0)	https://www.flickr.com/photos/topaz-mcnumpty/6689701391
Panthera tigris	Tiger	thedigme	Attribution-NonCommercial 2.0 Generic (CC BY-NC 2.0)	https://www.flickr.com/photos/9545305@N08/5190931355
Panthera uncia	Snow leopard	pipilongstockings	Attribution 2.0 Generic (CC BY 2.0)	https://www.flickr.com/photos/68732830@N06/8512762818
Puma concolor	Puma	Green Fire Productions	Attribution-ShareAlike 2.0 Generic (CC BY-SA 2.0)	https://www.flickr.com/photos/oregonstateuniversity/5058142266
Crocuta crocuta	Spotted hyena	Paul Mannix	Attribution 2.0 Generic (CC BY 2.0)	https://www.flickr.com/photos/paulmannix/398875151
Hyaena brunnea	Brown hyena	Bernard DUPONT	Attribution-ShareAlike 2.0 Generic (CC BY-SA 2.0)	https://www.flickr.com/photos/berniedup/6472937465
Hyaena hyaena	Striped hyena	Eric Kilby	Attribution-ShareAlike 2.0 Generic (CC BY-SA 2.0)	https://www.flickr.com/photos/ekilby/26995845551
Helarctos malayanus	Sun bear	Mark Dumont	Attribution-NonCommercial 2.0 Generic (CC BY-NC 2.0)	https://www.flickr.com/photos/wcdumonts/35158995050
Melursus ursinus	Sloth bear	Shannon Kringen	Attribution-ShareAlike 2.0 Generic (CC BY-SA 2.0)	https://www.flickr.com/photos/shannonkringen/4957141011
Tremarctos ornatus	Andean black bear	Nigel Swales	Attribution-ShareAlike 2.0 Generic (CC BY-SA 2.0)	https://www.flickr.com/photos/zooeurope/6177995619
Ursus americanus	American black bear	Jethro Taylor	Attribution-NonCommercial 2.0 Generic (CC BY-NC 2.0)	https://www.flickr.com/photos/rustybadger/4706829580
Ursus arctos	Brown bear	Gregory "Slobirdr" Smith	Attribution-ShareAlike 2.0 Generic (CC BY-SA 2.0)	https://www.flickr.com/photos/slobirdr/35522077081
Ursus thibetanus	Asiatic black bear	flowcomm	Attribution 2.0 Generic (CC BY 2.0)	https://www.flickr.com/photos/flowcomm/8085671203

## Sheet: Table S2. PA table
Species	Protected area	IUCN Category	Area (km2)	Footprint	% in low footprint	Nearest PA (km)	Country	Guild	Prey	Number of prey	Total prey	Status	Source	Status notes
Gray wolf	Vindelfjällen	Ib	5527	0.826254	0.910314	< 5	Sweden	TRUE	Lepus timidus,Capreolus capreolus,Cervus elaphus,Alces alces	4	51	Absent	https://en.wikipedia.org/wiki/Vindelfj%C3%A4llen_Nature_Reserve
Gray wolf	Taman Negara	II	4542	2.38691	0.431694	113	Malaysia	FALSE	Sus scrofa,Rusa unicolor	2	51	Unknown
Gray wolf	Lenya	II	3813	4.30247	0	< 5	Myanmar	FALSE	Muntiacus vaginalis,Lepus peguensis,Sus scrofa,Rusa unicolor	4	51	Unknown
Gray wolf	Thungyai Naresuan	Ia	3716	4.17366	0	< 5	Thailand	TRUE	Muntiacus vaginalis,Lepus peguensis,Sus scrofa,Rusa unicolor	4	51	Unknown
Gray wolf	Olympic	II	3697	1.37739	0.845638	30	United States of America	FALSE	Castor canadensis,Lepus americanus,Odocoileus hemionus,Oreamnos americanus	4	51	Absent	https://en.wikipedia.org/wiki/Mammals_of_Olympic_National_Park#Northwestern_wolf
Gray wolf	Tanintharyi National Park	II	3665	3.87897	0	< 5	Myanmar	TRUE	Muntiacus vaginalis,Lepus peguensis,Sus scrofa,Rusa unicolor	4	51	Unknown
Gray wolf	Hardangervidda	II	3421	2.74605	0.558824	10	Norway	FALSE	Lepus timidus,Rangifer tarandus,Capreolus capreolus,Cervus elaphus,Alces alces	5	51
Gray wolf	Virachey	II	3399	1.6093	0.76259	< 5	Cambodia	FALSE	Muntiacus vaginalis,Lepus peguensis,Sus scrofa,Rusa unicolor	4	51
Gray wolf	Riding Mountain National Park of Canada	II	3087	1.1755	0.84	45	Canada	FALSE	Castor canadensis,Lepus americanus,Lepus townsendii,Odocoileus virginianus,Alces alces	5	51
Gray wolf	Kaengkrachan Forest Complex	II	3049	3.49231	0	< 5	Thailand	TRUE	Muntiacus vaginalis,Lepus peguensis,Sus scrofa,Rusa unicolor	4	51
Gray wolf	Kaldoaivin erämaa	Ib	2931	0.512505	1	20	Finland	TRUE	Lepus timidus,Alces alces	2	51
Gray wolf	Sjaunja	Ia	2837	3.81667	0	< 5	Sweden	TRUE	Lepus timidus,Capreolus capreolus,Alces alces	3	51
Gray wolf	Huai Kha Khaeng	Ia	2831	5.45355	0	< 5	Thailand	TRUE	Muntiacus vaginalis,Lepus peguensis,Sus scrofa,Rusa unicolor	4	51
Gray wolf	Um Phang	Ia	2506	3.00138	0.653061	< 5	Thailand	TRUE	Muntiacus vaginalis,Lepus peguensis,Sus scrofa,Rusa unicolor	4	51
Gray wolf	Saltfjellet-Svartisen	II	2089	2.36942	0.740741	< 5	Norway	FALSE	Lepus timidus,Capreolus capreolus,Cervus elaphus,Alces alces	4	51
Gray wolf	Doi Phukha	II	1911	5.51835	0	< 5	Thailand	FALSE	Muntiacus vaginalis,Lepus peguensis,Sus scrofa,Rusa unicolor	4	51
Gray wolf	Khuen Si Nakarin	II	1858	7.26426	0	< 5	Thailand	TRUE	Muntiacus vaginalis,Lepus peguensis,Sus scrofa,Rusa unicolor	4	51
Gray wolf	Hammastunturin erämaa	Ib	1813	0.511454	0.917808	25	Finland	TRUE	Lepus timidus,Alces alces	2	51
Gray wolf	Varangerhalvøya	II	1797	3.36601	0.5	< 5	Norway	TRUE	Lepus timidus,Alces alces	2	51
Gray wolf	Sanjay	II	1718	11.6524	0	67	India	FALSE	Muntiacus vaginalis,Lepus nigricollis,Sus scrofa,Axis axis,Rusa unicolor	5	51
Gray wolf	Chiang Dao	Ia	1672	6.18293	0	< 5	Thailand	FALSE	Muntiacus vaginalis,Lepus peguensis,Sus scrofa,Rusa unicolor	4	51
Gray wolf	Alaungdaw	II	1630	7.27171	0	68	Myanmar	FALSE	Muntiacus vaginalis,Lepus peguensis,Sus scrofa,Rusa unicolor	4	51
Gray wolf	Phu Khiew	Ia	1583	6.16893	0	< 5	Thailand	FALSE	Muntiacus vaginalis,Lepus peguensis,Sus scrofa,Axis porcinus,Rusa unicolor	5	51
Gray wolf	Paistunturin erämaa	Ib	1563	2.44578	1	25	Finland	TRUE	Lepus timidus,Alces alces	2	51
Gray wolf	Kishtwar	II	1522	4.33796	0	52	India	FALSE	Lepus capensis	1	51
Dingo	Cape Arid	II	2758	1.91174	0.639344	< 5	Australia	TRUE	Oryctolagus cuniculus	1	6	Absent	Letnic et al. map	probably absent -- current map appears highly accurate
Dingo	Grampians	II	1684	4.58547	0.294118	10	Australia	TRUE	Macropus rufogriseus,Wallabia bicolor,Oryctolagus cuniculus	3	6	Absent	http://friendsofgrampiansgariwerd.org.au/2011/06/research-project-social-attitudes-towards-dingoes-and-wild-dogs-in-victoria/
Dingo	Mungo	II	1230	4.21344	0.173913	< 5	Australia	TRUE	Macropus robustus,Macropus rufus,Oryctolagus cuniculus	3	6	Absent	Letnic et al. map	probably absent -- current map appears highly accurate
Dingo	Stirling Range	II	1139	4.34754	0.333333	< 5	Australia	TRUE	Oryctolagus cuniculus	1	6	Absent	Letnic et al. map	probably absent -- current map appears highly accurate
Dingo	Yathong	Ia	1136	2.77931	0.636364	< 5	Australia	TRUE	Macropus robustus,Macropus rufus,Oryctolagus cuniculus	3	6	Absent	Letnic et al. map	probably absent -- current map appears highly accurate
Dingo	Great Otway	II	1040	6.15285	0.142857	< 5	Australia	TRUE	Macropus rufogriseus,Wallabia bicolor,Oryctolagus cuniculus	3	6	Absent	Letnic et al. map	probably absent -- current map appears highly accurate
Dingo	Nombinnie	Ia	725	1.83226	0.766667	< 5	Australia	TRUE	Macropus robustus,Macropus rufus,Oryctolagus cuniculus	3	6
Dingo	Hincks	Ib	671	1.89456	0.791667	25	Australia	TRUE	Macropus robustus,Oryctolagus cuniculus	2	6
Dingo	Beekeepers	Ia	660	4.0847	0.346154	< 5	Australia	TRUE	Macropus robustus,Oryctolagus cuniculus	2	6
Dingo	Gundabooka	II	643	3.36094	0.52	< 5	Australia	TRUE	Macropus robustus,Macropus rufus,Wallabia bicolor,Oryctolagus cuniculus	4	6
Dingo	Billiatt	Ib	594	1.62003	0.833333	7	Australia	TRUE	Macropus rufus,Oryctolagus cuniculus	2	6
Dingo	Mallee Cliffs	Ia	583	1.03522	0.958333	39	Australia	TRUE	Macropus robustus,Macropus rufus,Oryctolagus cuniculus	3	6
Dingo	Tone-Perup	Ia	561	4.74082	0.222222	< 5	Australia	TRUE	Oryctolagus cuniculus	1	6
Dingo	Goonoo	II	546	6.49134	0	< 5	Australia	TRUE	Macropus robustus,Macropus rufogriseus,Wallabia bicolor,Oryctolagus cuniculus	4	6
Dingo	Toorale	II	540	4.52078	0.380952	< 5	Australia	TRUE	Macropus robustus,Macropus rufus,Wallabia bicolor,Oryctolagus cuniculus	4	6
Dingo	Wandana	Ia	537	2.14411	0.818182	15	Australia	TRUE	Macropus robustus,Macropus rufus,Oryctolagus cuniculus	3	6
Dingo	Murrumbidgee Valley	II	485	6.44272	0.166667	< 5	Australia	TRUE	Macropus robustus,Macropus rufus,Wallabia bicolor,Oryctolagus cuniculus	4	6
Dingo	Wandoo	II	465	4.73047	0.263158	5	Australia	TRUE	Oryctolagus cuniculus	1	6
Dingo	Nombinnie	II	465	2.20224	0.684211	< 5	Australia	TRUE	Macropus robustus,Macropus rufus,Oryctolagus cuniculus	3	6
Dingo	Goobang	II	426	3.6137	0.636364	10	Australia	TRUE	Macropus robustus,Macropus rufogriseus,Wallabia bicolor,Oryctolagus cuniculus	4	6
Dingo	Lane Poole Reserve	II	421	3.11611	0.722222	< 5	Australia	TRUE	Oryctolagus cuniculus	1	6
Dingo	Ravine des Casoars	Ib	410	4.18694	0.388889	< 5	Australia	TRUE		0	6
Dingo	Murray Valley	II	397	9.1941	0	< 5	Australia	TRUE	Wallabia bicolor,Oryctolagus cuniculus	2	6
Dingo	Hambidge	Ib	382	1.7918	0.75	22	Australia	TRUE	Macropus robustus,Oryctolagus cuniculus	2	6
Dingo	Pilliga West	II	366	2.92167	0.5	< 5	Australia	TRUE	Macropus robustus,Macropus rufogriseus,Macropus rufus,Wallabia bicolor,Oryctolagus cuniculus	5	6
Red wolf	Everglades	Ib	4187	3.52493	0.43254	< 5	United States of America	TRUE	Sylvilagus floridanus,Sylvilagus palustris,Odocoileus virginianus	3	3	Absent	https://www.change.org/p/florida-fish-and-wildlife-florida-fish-and-wildlife-conservation-commission-reintroduce-the-red-wolf-in-everglades-national-park
Red wolf	Biscayne	II	38	7	0	< 5	United States of America	FALSE		0	3	Unknown
Red wolf	Collier-Seminole	II	29	9.60011	0	11	United States of America	TRUE	Sylvilagus floridanus,Sylvilagus palustris,Odocoileus virginianus	3	3	Unknown
Ethiopian wolf	Boma	II	19887	6.27163	0	< 5	South Sudan	TRUE		0	4	Unknown
Ethiopian wolf	Gambella	II	5811	4.07578	0.0646552	14	Ethiopia	FALSE		0	4	Unknown
Ethiopian wolf	Boma Extension	II	4921	6.35559	0	< 5	South Sudan	TRUE		0	4	Unknown
Ethiopian wolf	Omo	II	4323	3.67315	0.591716	15	Ethiopia	TRUE	Otomys typus	1	4	Unknown	https://books.google.com/books?id=wENuDQAAQBAJ&pg=PA409&lpg=PA409&dq=%22ethiopian+wolf%22+%22omo+national+park%22&source=bl&ots=QjlfyI5YJU&sig=X-OaKopWkng0x85TUCtoGrA1jfs&hl=en&sa=X&ved=0ahUKEwjqjeOnxZDUAhUU0WMKHXiAB5Y4ChDoAQhTMAk#v=onepage&q=%22ethiopian%20wolf%22%20%22omo%20national%20park%22&f=false
Ethiopian wolf	Yangudi Rassa	II	3065	5.45695	0	214	Ethiopia	FALSE		0	4	Unknown
Ethiopian wolf	Yabello	II	2213	5.58747	0.321839	103	Ethiopia	FALSE		0	4	Unknown
Ethiopian wolf	Abijatta-Shalla Lakes	II	1805	8.90933	0.0694444	83	Ethiopia	FALSE	Otomys typus	1	4
Ethiopian wolf	Mago	II	1364	4.67669	0.327273	15	Ethiopia	TRUE		0	4
Ethiopian wolf	Nechisar	II	1037	8.86932	0	103	Ethiopia	FALSE	Otomys typus	1	4
Ethiopian wolf	Awash	II	743	9.74144	0	181	Ethiopia	FALSE	Otomys typus	1	4
Dhole	Great Gobi	Ia	53465	0.449921	0.695734	15	Mongolia	TRUE		0	15	Unknown
Dhole	Gobi Gurvansaikhan range	II	26943	1.74035	0.123959	21	Mongolia	TRUE		0	15	Unknown
Dhole	Tajik National Park	II	23358	4.58404	0.10989	50	Tajikistan	FALSE	Sus scrofa	1	15	Unknown
Dhole	Gobiin baga /A/, /B/	Ib	18315	0.985892	0.359613	60	Mongolia	FALSE		0	15	Unknown
Dhole	Khan Khentii	Ib	17453	2.52056	0.01	< 5	Mongolia	TRUE	Sus scrofa	1	15	Unknown
Dhole	Khuvsgul	II	11724	3.07272	0	< 5	Mongolia	TRUE	Sus scrofa	1	15	Unknown
Dhole	Khangai nuruu	II	9049	5.42853	0	< 5	Mongolia	FALSE	Sus scrofa	1	15
Dhole	Tengis-Shishged	II	8711	1.2487	0	< 5	Mongolia	TRUE	Sus scrofa	1	15
Dhole	Har Us Nuur	II	8600	2.75637	0.0439883	40	Mongolia	FALSE	Sus scrofa	1	15
Dhole	Altai Tavan range	II	6330	5.54399	0	18	Mongolia	FALSE	Sus scrofa	1	15
Dhole	Issyk-Kul	Ia	6315	9.33757	0	10	Kyrgyzstan	FALSE	Sus scrofa	1	15
Dhole	Zed-Khantai-Buteeliin nuruu	Ia	6039	2.70733	0	64	Mongolia	FALSE	Sus scrofa	1	15
Dhole	Tarvagatai nuruu	II	5442	5.4062	0	< 5	Mongolia	FALSE	Sus scrofa	1	15
Dhole	Eastern Mongolian Steppe	Ib	5029	6.92392	0	208	Mongolia	FALSE		0	15
Dhole	Munkhkhairkhan uul-Uenchiin khavtsal	II	4936	4.11027	0	25	Mongolia	TRUE	Sus scrofa	1	15
Dhole	Uvs Nuur Basin	Ia	4417	4.15472	0	34	Mongolia	FALSE	Sus scrofa	1	15
Dhole	Ulaan Taiga	Ib	4292	1.54878	0	< 5	Mongolia	FALSE	Sus scrofa	1	15
Dhole	Shorsky	II	3858	1.68321	0	27	Russian Federation	FALSE		0	15
Dhole	Lenya	II	3813	4.30247	0	< 5	Myanmar	FALSE	Muntiacus vaginalis,Muntiacus feae,Sus scrofa,Rusa unicolor	4	15
Dhole	Bureinsky	Ia	3524	0.138284	0.904412	42	Russian Federation	FALSE	Sus scrofa	1	15
Dhole	Khan Khukhii-Khyragas Lake	II	3501	2.59987	0.0218978	14	Mongolia	FALSE		0	15
Dhole	Khunjerab	II	3341	6.65141	0	103	Pakistan	FALSE		0	15
Dhole	Azas	Ia	3327	0.0633945	0.840909	< 5	Russian Federation	TRUE		0	15
Dhole	Numrug	Ib	3116	6.96496	0	250	Mongolia	FALSE	Sus scrofa	1	15
Dhole	Ele Alatau	II	3115	6.36562	0	< 5	Kazakhstan	FALSE	Sus scrofa	1	15
African wild dog	Namib-Naukluft	II	50985	1.71204	0.476378	122	Namibia	FALSE	Tragelaphus strepsiceros	1	5	Absent	https://www.safaribookings.com/namib-naukluft/wildlife
African wild dog	Gemsbok	Ib	26051	2.22432	0.27027	190	Botswana	TRUE	Tragelaphus strepsiceros	1	5	Unknown	https://books.google.com/books?id=NfD4Sqz8pD0C&pg=PA101&lpg=PA101&dq=african+%22wild+dog%22+%22gemsbok+national+park%22&source=bl&ots=GclH1yTS0M&sig=LAC6Vn2LB9gbPAO8paSa_yNnzyQ&hl=en&sa=X&ved=0ahUKEwjZkpzNz5DUAhUH02MKHfuYDr4Q6AEINzAF#v=onepage&q=african%20%22wild%20dog%22%20%22gemsbok%20national%20park%22&f=false	reintroduction attempted
African wild dog	Etosha	II	23063	3.29229	0.14488	110	Namibia	TRUE	Tragelaphus strepsiceros,Aepyceros melampus	2	5	Unknown	https://books.google.com/books?id=NfD4Sqz8pD0C&pg=PA101&lpg=PA101&dq=african+%22wild+dog%22+%22gemsbok+national+park%22&source=bl&ots=GclH1yTS0M&sig=LAC6Vn2LB9gbPAO8paSa_yNnzyQ&hl=en&sa=X&ved=0ahUKEwjZkpzNz5DUAhUH02MKHfuYDr4Q6AEINzAF#v=onepage&q=african%20%22wild%20dog%22%20%22gemsbok%20national%20park%22&f=false	3 failed reintroduction attempts
African wild dog	Skeleton Coast Park	II	16758	0.783259	0.744745	< 5	Namibia	TRUE	Aepyceros melampus	1	5	Unknown
African wild dog	National Park Iona	II	15341	4.90352	0	< 5	Angola	TRUE	Tragelaphus strepsiceros,Aepyceros melampus	2	5	Absent	https://books.google.com/books?id=NfD4Sqz8pD0C&pg=PA39&lpg=PA39&dq=african+wild+dog+National+Park+Iona&source=bl&ots=GclKVDUO0F&sig=mjMLBHHFmAs1U3KubdUCuaOTDVM&hl=en&sa=X&ved=0ahUKEwjl3Nrbj9LUAhXmyFQKHYXfDm0Q6AEINzAF#v=onepage&q=african%20wild%20dog%20National%20Park%20Iona&f=false	May have been to dry to have historically supported this species
African wild dog	National Park Cameia	II	14273	2.84599	0.350263	195	Angola	FALSE	Tragelaphus scriptus	1	5	Unknown	https://martynmurray.wordpress.com/2016/06/30/call-for-a-parks-red-list/	May have been to dry to have historically supported this species
African wild dog	Upemba	II	13527	4.80598	0.0169173	10	Democratic Republic of the Congo	FALSE	Tragelaphus scriptus	1	5
African wild dog	Serengeti	II	13155	6.87412	0	< 5	United Republic of Tanzania	TRUE	Tragelaphus scriptus,Tragelaphus imberbis,Tragelaphus strepsiceros,Aepyceros melampus,Eudorcas thomsonii	5	5
African wild dog	National Park Quiçama	II	8641	5.80882	0	240	Angola	FALSE	Tragelaphus scriptus	1	5
African wild dog	Kundelungu	II	8092	5.19575	0	10	Democratic Republic of the Congo	FALSE	Tragelaphus scriptus,Tragelaphus strepsiceros	2	5
African wild dog	Virunga	II	7879	5.7502	0	55	Democratic Republic of the Congo	FALSE	Tragelaphus scriptus	1	5
African wild dog	National Park Bicuar	II	7773	6.16411	0	14	Angola	FALSE	Tragelaphus strepsiceros	1	5
African wild dog	Kahuzi-Biega	II	6776	5.67799	0	92	Democratic Republic of the Congo	FALSE	Tragelaphus scriptus	1	5
African wild dog	Bomu	Ib	6590	2.44476	0.217557	28	Democratic Republic of the Congo	FALSE	Tragelaphus scriptus	1	5
African wild dog	W (Benin)	II	5819	6.19228	0	< 5	Benin	TRUE	Tragelaphus scriptus	1	5
African wild dog	Gambella	II	5811	4.07578	0.193966	14	Ethiopia	FALSE	Tragelaphus scriptus	1	5
African wild dog	National Park Mavinga	II	5644	2.77919	0.155556	131	Angola	FALSE	Tragelaphus scriptus	1	5
African wild dog	Banc d'Arguin	II	5473	2.26333	0.0810235	34	Mauritania	FALSE		0	5
African wild dog	National Park Mupa	II	5398	3.00727	0	14	Angola	FALSE	Tragelaphus strepsiceros	1	5
African wild dog	Garamba	II	4982	3.77367	0	< 5	Democratic Republic of the Congo	FALSE	Tragelaphus scriptus	1	5
African wild dog	Mole	II	4522	6.60073	0	62	Ghana	FALSE	Tragelaphus scriptus	1	5
African wild dog	Ai-Ais Hot Springs	II	4370	2.38729	0.402299	135	Namibia	FALSE	Tragelaphus strepsiceros	1	5
African wild dog	Mbam et Djerem	II	4316	3.94453	0	67	Cameroon	FALSE	Tragelaphus scriptus	1	5
African wild dog	Bomu	II	4152	2.56661	0.246988	28	Democratic Republic of the Congo	FALSE	Tragelaphus scriptus	1	5
African wild dog	Conkouati-Douli	II	3971	3.09453	0.00956938	553	Congo	FALSE	Tragelaphus scriptus	1	5
Cheetah	Niassa	II	22860	2.24824	0.0527473	243	Mozambique	TRUE	Aepyceros melampus	1	5	Unknown	http://www.niassalion.org/niassa-reserve.php	May not have historically occurred here
Cheetah	Dakhla National Park	II	16404	0.670691	0.369077	34	Morocco	FALSE		0	5	Unknown
Cheetah	National Park Cameia	II	14273	2.84599	0	195	Angola	FALSE		0	5	Present	http://www.the-eis.com/data/literature/Status%20of%20the%20cheetah_1998.pdf	seen here in 1975
Cheetah	Upemba	II	13527	4.80598	0	10	Democratic Republic of the Congo	FALSE		0	5	Present	https://saveupemba.com/
Cheetah	'Uruq Bani Ma'arid	II	12714	3.51204	0	391	Saudi Arabia	FALSE		0	5	Unknown
Cheetah	At-Tubayq	III	12245	3.6449	0	139	Saudi Arabia	FALSE		0	5	Unknown
Cheetah	South Luangwa	II	8985	4.97469	0	10	Zambia	TRUE	Aepyceros melampus	1	5	Present	http://www.catsg.org/fileadmin/filesharing/3.Conservation_Center/3.2._Status_Reports/Cheetah/Purchase_2007_Cheetah_in_Zambia.pdf
Cheetah	National Park Quiçama	II	8641	5.80882	0	240	Angola	FALSE		0	5	Unknown	https://en.wikipedia.org/wiki/Qui%C3%A7ama_National_Park
Cheetah	Dinder	II	8451	6.40606	0	181	Sudan	TRUE		0	5	Present	https://en.wikipedia.org/wiki/Dinder_National_Park
Cheetah	Niokolo Koba	II	8283	3.21161	0	< 5	Senegal	TRUE		0	5	Present	http://www.beauvalnature.com/en/conservation/programs/niokolo-koba
Cheetah	Kundelungu	II	8092	5.19575	0	10	Democratic Republic of the Congo	FALSE		0	5	Present	https://www.quefaire.cd/item/kundelungu-national-park/	might be incorrectly listed as present for advertising reasons
Cheetah	Virunga	II	7879	5.7502	0	55	Democratic Republic of the Congo	FALSE		0	5	Present	http://www.overlandingafrica.com/drc/virunga-national-park/
Cheetah	National Park Bicuar	II	7773	6.16411	0	14	Angola	FALSE		0	5	Present	http://www.angolamarket.com/index.php?page=view/tag/bicuar%20park
Cheetah	Bomu	Ib	6590	2.44476	0	28	Democratic Republic of the Congo	FALSE		0	5	Unknown
Cheetah	Kainji Lake	II	5861	6.73287	0	85	Nigeria	TRUE		0	5
Cheetah	National Park Mavinga	II	5644	2.77919	0	131	Angola	FALSE		0	5
Cheetah	Banc d'Arguin	II	5473	2.26333	0.0788913	34	Mauritania	FALSE		0	5
Cheetah	National Park Mupa	II	5398	3.00727	0	14	Angola	FALSE		0	5
Cheetah	Kaplangurskiy	Ia	5237	5.77917	0	199	Turkmenistan	FALSE		0	5
Cheetah	Garamba	II	4982	3.77367	0	< 5	Democratic Republic of the Congo	FALSE		0	5
Cheetah	Wadi El-Gemal - Hamata	II	4865	2.11155	0.0467626	325	Egypt	FALSE		0	5
Cheetah	North Luangwa	II	4538	2.95928	0	10	Zambia	TRUE	Aepyceros melampus	1	5
Cheetah	Mole	II	4522	6.60073	0	62	Ghana	FALSE		0	5
Cheetah	Jabal Samhan Nature Reserve	II	4461	2.06033	0.0208333	271	Oman	TRUE		0	5
Cheetah	Urumieh lake	II	4423	7.2843	0	53	Iran (Islamic Republic of)	FALSE		0	5
Eurasian lynx	Podolskie Tovtry	II	2590	15.4924	0.00925926	< 5	Ukraine	FALSE	Capreolus capreolus,Cervus elaphus	2	5	Unknown
Eurasian lynx	Parco nazionale del Pollino	II	1824	12.1994	0.132353	< 5	Italy	FALSE	Capreolus capreolus	1	5	Unknown
Eurasian lynx	Parco nazionale del Cilento e Vallo di Diano	II	1783	27.115	0	59	Italy	FALSE		0	5	Unknown
Eurasian lynx	Parco nazionale dello Stelvio	II	1307	9.43004	0.314815	< 5	Italy	FALSE	Rupicapra rupicapra,Capreolus capreolus,Cervus elaphus	3	5	Present	http://www.parks.it/parco.nazionale.stelvio/Epar.php
Eurasian lynx	Parco nazionale del Gargano	II	1115	14.6079	0.0196078	90	Italy	FALSE	Capreolus capreolus	1	5	Absent	https://translate.google.com/translate?hl=en&sl=it&u=http://www.gaclagunegargano.it/index.php/il-territorio/parco-nazionale-del-gargano%3Fshowall%3D1%26limitstart%3D&prev=search
Eurasian lynx	Rila	II	778	8.73555	0.290323	85	Bulgaria	TRUE	Rupicapra rupicapra,Capreolus capreolus,Cervus elaphus	3	5	Unknown
Eurasian lynx	Parco nazionale della Sila	II	773	9.04725	0.3	32	Italy	FALSE	Capreolus capreolus,Cervus elaphus	2	5	Unknown	https://translate.google.com/translate?hl=en&sl=it&u=https://it.wikipedia.org/wiki/Parco_nazionale_della_Sila&prev=search
Eurasian lynx	Parco nazionale del Gran Paradiso	II	711	7.30346	0.62069	78	Italy	FALSE	Rupicapra rupicapra,Capreolus capreolus,Cervus elaphus	3	5
Eurasian lynx	Parco nazionale dei Monti Sibillini	II	698	9.48124	0.269231	83	Italy	TRUE	Capreolus capreolus	1	5
Eurasian lynx	Parco nazionale dell'Appennino Lucano-Val d'Agri-Lagonegrese	II	691	12.6309	0.111111	< 5	Italy	FALSE	Capreolus capreolus	1	5
Eurasian lynx	Mercantour	II	680	7.28271	0.538462	93	France	FALSE	Rupicapra rupicapra,Capreolus capreolus	2	5
Eurasian lynx	Parco nazionale dell'Aspromonte	II	647	12.3374	0.133333	72	Italy	FALSE	Capreolus capreolus	1	5
Eurasian lynx	Hohe Tauern	II	611	8.56313	0.291667	< 5	Austria	FALSE	Rupicapra rupicapra,Capreolus capreolus,Cervus elaphus	3	5
Eurasian lynx	Parco nazionale Abruzzo, Lazio e Molise	II	507	6.55229	1	83	Italy	TRUE	Capreolus capreolus,Cervus elaphus	2	5
Eurasian lynx	Kiskunsági	II	505	14.0969	0	95	Hungary	FALSE	Capreolus capreolus,Cervus elaphus	2	5
Eurasian lynx	Pyrénées	II	457	8.53748	0.363636	144	France	FALSE	Capreolus capreolus,Cervus elaphus	2	5
Eurasian lynx	Hohe Tauern	II	440	8.17702	0.375	< 5	Austria	FALSE	Rupicapra rupicapra,Capreolus capreolus,Cervus elaphus	3	5
Eurasian lynx	Bükki	II	428	9.66523	0	145	Hungary	FALSE	Capreolus capreolus,Cervus elaphus	2	5
Eurasian lynx	Aukstaitijos nacionalinis parkas	II	410	10.1331	0.235294	40	Lithuania	FALSE	Capreolus capreolus,Cervus elaphus	2	5
Eurasian lynx	Parco nazionale delle Foreste Casentinesi, Monte Falterona e Campigna	II	369	7.46656	0.647059	112	Italy	FALSE	Capreolus capreolus,Cervus elaphus	2	5
Eurasian lynx	Parco nazionale delle Dolomiti Bellunesi	II	310	10.0869	0	60	Italy	FALSE	Rupicapra rupicapra,Capreolus capreolus,Cervus elaphus	3	5
Eurasian lynx	Galichica	II	244	11.7331	0	< 5	The former Yugoslav Republic of Macedonia	TRUE	Capreolus capreolus	1	5
Eurasian lynx	Ferto-Hansági	II	237	12.6882	0.25	55	Hungary	FALSE	Capreolus capreolus,Cervus elaphus	2	5
Eurasian lynx	Parco nazionale dell'Appennino Tosco-Emiliano	II	228	7.90826	0.5	43	Italy	FALSE	Rupicapra rupicapra,Capreolus capreolus,Cervus elaphus	3	5
Eurasian lynx	Zemaitijos nacionalinis parkas	II	218	10.0519	0	54	Lithuania	FALSE	Capreolus capreolus,Cervus elaphus	2	5
Sunda clouded leopard	Muara Kendawangan	Ia	1486	4.94243	0.533333	115	Indonesia	TRUE		0	0	Unknown
Sunda clouded leopard	Danau Sentarum	II	1278	5.77623	0.313725	30	Indonesia	TRUE		0	0	Present	http://www.borneo-ecoadventure.com/betung-kerihun-danau-sentarum-national-parks/
Sunda clouded leopard	Way Kambas	II	1278	7.91283	0.339623	127	Indonesia	FALSE		0	0	Present	http://reefandrainforest.co.uk/highlights/way-kambas-national-park
Sunda clouded leopard	Gunung Nyiut Penrissen	Ia	924	5.98565	0.388889	66	Indonesia	TRUE		0	0	Unknown
Sunda clouded leopard	Tesso Nilo	II	827	4.56758	0.702703	51	Indonesia	TRUE		0	0	Present	http://www.iucnredlist.org/details/136866/summary
Sunda clouded leopard	Teluk Kelumpang Selat Laut Selat Sebuku	Ia	578	10.271	0	21	Indonesia	TRUE		0	0	Unknown
Sunda clouded leopard	Bukit Dua Belas	II	551	7.75892	0.0869565	60	Indonesia	FALSE		0	0	Present	https://en.wikipedia.org/wiki/Bukit_Duabelas_National_Park
Sunda clouded leopard	Teluk Apar	Ia	463	6.90671	0.1	20	Indonesia	TRUE		0	0	Unknown
Sunda clouded leopard	Kepulauan Karimata	Ib	221	6.30612	0.0235294	58	Indonesia	TRUE		0	0	Unknown
Sunda clouded leopard	Teluk Pamukan	Ia	192	9.1101	0	21	Indonesia	TRUE		0	0	Unknown
Sunda clouded leopard	Bidu-Bidu	Ia	158	7.31511	0.25	5	Malaysia	TRUE		0	0
Sunda clouded leopard	Mount Pock	Ia	117	14.389	0	15	Malaysia	FALSE		0	0
Sunda clouded leopard	Timbun Mata	Ia	112	11.9177	0	15	Malaysia	FALSE		0	0
Sunda clouded leopard	Gomantong	Ia	51	14.7786	0	5	Malaysia	TRUE		0	0
Sunda clouded leopard	Dolok Sibual-buali	Ia	51	9.92461	0	5	Indonesia	TRUE		0	0
Sunda clouded leopard	Pin-Supu	Ia	44	13.6582	0	5	Malaysia	TRUE		0	0
Sunda clouded leopard	Gunung Raya Passi	Ia	32	12.1226	0	66	Indonesia	TRUE		0	0
Sunda clouded leopard	Lubuk Raya	Ia	30	8.58255	0	5	Indonesia	TRUE		0	0
Sunda clouded leopard	Mandor	III	29	5.0427	0	74	Indonesia	TRUE		0	0
Clouded leopard	Doi Phukha	II	1911	5.51835	0.830986	< 5	Thailand	FALSE		0	0	Unknown
Clouded leopard	Sri Lanna	II	1486	6.10688	0.8	< 5	Thailand	FALSE		0	0	Present	http://thaihorsefarm.com/en/northern-thailand/sri-lanna-national-park/
Clouded leopard	Preah Monivong (Bokor)	II	1433	5.5437	0.689655	10	Cambodia	FALSE		0	0	Present	http://www.open-earth.org/document/natureR_main.php?natureId=280
Clouded leopard	Doi Luang	II	1318	7.69044	0.236364	< 5	Thailand	FALSE		0	0	Unknown
Clouded leopard	Khao Bantad	Ia	1252	8.57713	0.1	< 5	Thailand	FALSE		0	0	Unknown
Clouded leopard	Tham Phathai	II	1252	5.76801	0.8	< 5	Thailand	FALSE		0	0	Unknown
Clouded leopard	Mae Tuen	Ia	1246	7.61666	0.306122	< 5	Thailand	FALSE		0	0	Unknown
Clouded leopard	Huai Nam Dang	II	1238	5.05817	0.836735	< 5	Thailand	FALSE		0	0	Unknown
Clouded leopard	Phong Nha-Ke Bang	II	1223	3.08812	0.897959	63	Viet Nam	FALSE		0	0
Clouded leopard	Om Koi	Ia	1211	6.25029	0.55102	< 5	Thailand	FALSE		0	0
Clouded leopard	Lum Nam Pai	Ia	1208	5.348	0.666667	< 5	Thailand	FALSE		0	0
Clouded leopard	Mae Charim	II	1109	5.1982	0.866667	< 5	Thailand	FALSE		0	0
Clouded leopard	Natma Taung	II	1098	5.22839	0.666667	68	Myanmar	FALSE		0	0
Clouded leopard	Yok Don	II	1070	8.40553	0.268293	60	Viet Nam	FALSE		0	0
Clouded leopard	Mae Ping	II	1052	8.87919	0.0243902	< 5	Thailand	FALSE		0	0
Clouded leopard	Lam Nam Nan	II	1051	7.94961	0.0444444	< 5	Thailand	FALSE		0	0
Clouded leopard	Yushan	II	1036	8.82141	0.0731707	25	Taiwan, Province of China	TRUE		0	0
Clouded leopard	Si Nan	II	1003	7.20466	0.128205	< 5	Thailand	FALSE		0	0
Clouded leopard	Mae Tho	II	1000	7.62985	0.4	< 5	Thailand	FALSE		0	0
Clouded leopard	Namtok Phacharoen	II	979	6.12784	0.594595	< 5	Thailand	FALSE		0	0
Clouded leopard	Taroko	II	979	8.60809	0	< 5	Taiwan, Province of China	TRUE		0	0
Clouded leopard	Salak Phra	Ia	978	7.62025	0.512821	< 5	Thailand	FALSE		0	0
Clouded leopard	Bardia	II	900	13.1997	0	< 5	Nepal	FALSE		0	0
Clouded leopard	Doi Phunang	II	872	5.92026	0.75	< 5	Thailand	FALSE		0	0
Clouded leopard	Nunthaburi	II	870	6.13488	0.53125	< 5	Thailand	FALSE		0	0
Lion	Parc Culturel du Tassili (Illizi)	II	99331	1.32416	0.00530839	924	Algeria	TRUE		0	7	Unknown
Lion	Namib-Naukluft	II	50985	1.71204	0.460138	122	Namibia	FALSE	Oryx gazella,Equus zebra,Giraffa camelopardalis	3	7	Absent	https://www.safaribookings.com/namib-naukluft/wildlife	Source may be inaccurate here. We were not able to find additional verification.
Lion	Dakhla National Park	II	16404	0.670691	0.694514	34	Morocco	FALSE		0	7	Unknown
Lion	National Park Cameia	II	14273	2.84599	0.220665	195	Angola	FALSE		0	7	Absent	http://www.africatouroperators.org/angola/cameia-national-park
Lion	Odzala Kokoua	II	13695	1.15316	0.726433	65	Congo	TRUE	Syncerus caffer	1	7	Unknown	https://global.wcs.org/Resources/Publications/Publications-Search-II/ctl/view/mid/13340/pubid/PUB15149.aspx
Lion	Upemba	II	13527	4.80598	0.0131579	10	Democratic Republic of the Congo	FALSE	Syncerus caffer,Equus quagga	2	7	Present	https://www.britannica.com/place/Upemba-National-Park
Lion	Badingilo	II	8997	7.88162	0	< 5	South Sudan	TRUE	Syncerus caffer,Giraffa camelopardalis	2	7	Present	https://en.wikipedia.org/wiki/Bandingilo_National_Park
Lion	National Park Quiçama	II	8641	5.80882	0	240	Angola	FALSE	Syncerus caffer	1	7	Present	http://www.hellotravel.com/angola/kissama-national-park-must-watch-wildlife-safari-spot
Lion	Kundelungu	II	8092	5.19575	0	10	Democratic Republic of the Congo	FALSE		0	7	Present	https://translate.google.com/translate?hl=en&sl=fr&u=https://fr.wikipedia.org/wiki/Parc_national_de_Kundelungu&prev=search
Lion	Badingilo Extension	II	7774	7.99967	0	< 5	South Sudan	TRUE	Syncerus caffer,Giraffa camelopardalis	2	7	Unknown
Lion	National Park Bicuar	II	7773	6.16411	0	14	Angola	FALSE	Connochaetes taurinus	1	7
Lion	Kahuzi-Biega	II	6776	5.67799	0	92	Democratic Republic of the Congo	FALSE	Syncerus caffer	1	7
Lion	Gashaka-Gumti	II	5906	4.68291	0	< 5	Nigeria	TRUE	Syncerus caffer	1	7
Lion	National Park Mavinga	II	5644	2.77919	0.0444444	131	Angola	FALSE	Syncerus caffer,Equus quagga,Connochaetes taurinus,Giraffa camelopardalis	4	7
Lion	Banc d'Arguin	II	5473	2.26333	0.10661	34	Mauritania	FALSE		0	7
Lion	National Park Mupa	II	5398	3.00727	0	14	Angola	FALSE	Connochaetes taurinus	1	7
Lion	Wadi El-Gemal - Hamata	II	4865	2.11155	0.356115	325	Egypt	FALSE		0	7
Lion	Mole	II	4522	6.60073	0	62	Ghana	FALSE	Syncerus caffer	1	7
Lion	Kavir	II	4440	5.37941	0	100	Iran (Islamic Republic of)	FALSE		0	7
Lion	Urumieh lake	II	4423	7.2843	0.166667	53	Iran (Islamic Republic of)	FALSE		0	7
Lion	Ai-Ais Hot Springs	II	4370	2.38729	0.362069	135	Namibia	FALSE	Oryx gazella,Equus zebra,Giraffa camelopardalis	3	7
Lion	Mbam et Djerem	II	4316	3.94453	0	67	Cameroon	FALSE	Syncerus caffer	1	7
Lion	Conkouati-Douli	II	3971	3.09453	0	553	Congo	FALSE	Syncerus caffer	1	7
Lion	Cross River	II	3319	5.96663	0	< 5	Nigeria	FALSE	Syncerus caffer	1	7
Lion	Nki	II	3260	2.41415	0	20	Cameroon	TRUE	Syncerus caffer	1	7
Jaguar	Juruena	II	19695	0.310254	0.938383	< 5	Brazil	TRUE	Hydrochoerus hydrochaeris,Priodontes maximus,Cabassous unicinctus,Pecari tajacu,Tayassu pecari,Dasypus kappleri,Dasypus novemcinctus,Cuniculus paca	8	22	Present	https://en.wikipedia.org/wiki/Juruena_National_Park
Jaguar	Mapinguari	II	17884	0.384905	0.860597	< 5	Brazil	TRUE	Hydrochoerus hydrochaeris,Priodontes maximus,Cabassous unicinctus,Pecari tajacu,Tayassu pecari,Dasypus kappleri,Dasypus novemcinctus,Cuniculus paca	8	22	Unknown
Jaguar	Maicuru	Ia	11810	0.387998	0.879464	< 5	Brazil	TRUE	Hydrochoerus hydrochaeris,Priodontes maximus,Cabassous unicinctus,Pecari tajacu,Tayassu pecari,Dasypus kappleri,Dasypus novemcinctus,Cuniculus paca,Euphractus sexcinctus	9	22	Present	https://en.wikipedia.org/wiki/Maicuru_Biological_Reserve
Jaguar	Campos Amazônicos	II	9675	0.469078	0.839474	< 5	Brazil	TRUE	Hydrochoerus hydrochaeris,Priodontes maximus,Cabassous unicinctus,Pecari tajacu,Tayassu pecari,Dasypus kappleri,Dasypus novemcinctus,Cuniculus paca	8	22	Unknown	Campos Amazonicos National park
Jaguar	Pacaás Novos	II	7131	4.81395	0	18	Brazil	TRUE	Hydrochoerus hydrochaeris,Priodontes maximus,Cabassous unicinctus,Pecari tajacu,Tayassu pecari,Dasypus kappleri,Dasypus novemcinctus,Cuniculus paca	8	22	Unknown	Pacaás Novos National park
Jaguar	La Payunia	Ia	6842	1.18813	0.462687	67	Argentina	TRUE	Chaetophractus villosus	1	22	Unknown
Jaguar	Guaporé	Ia	6196	0.961082	0.662602	18	Brazil	TRUE	Hydrochoerus hydrochaeris,Priodontes maximus,Cabassous unicinctus,Pecari tajacu,Tayassu pecari,Dasypus kappleri,Dasypus novemcinctus,Cuniculus paca	8	22	Unknown
Jaguar	Rio Novo	II	5416	2.13347	0.406542	78	Brazil	TRUE	Hydrochoerus hydrochaeris,Priodontes maximus,Cabassous unicinctus,Pecari tajacu,Tayassu pecari,Dasypus novemcinctus,Dasypus septemcinctus,Cuniculus paca,Euphractus sexcinctus	9	22	Unknown
Jaguar	Serra do Pardo	II	4483	0.544372	0.788889	< 5	Brazil	TRUE	Hydrochoerus hydrochaeris,Priodontes maximus,Cabassous unicinctus,Pecari tajacu,Tayassu pecari,Dasypus novemcinctus,Dasypus septemcinctus,Cuniculus paca,Euphractus sexcinctus	9	22
Jaguar	Rio Trombetas	Ia	4105	1.01362	0.62963	110	Brazil	TRUE	Hydrochoerus hydrochaeris,Priodontes maximus,Cabassous unicinctus,Pecari tajacu,Tayassu pecari,Dasypus kappleri,Dasypus novemcinctus,Cuniculus paca,Euphractus sexcinctus	9	22
Jaguar	Jaru	Ia	3491	4.3154	0.00719424	30	Brazil	TRUE	Hydrochoerus hydrochaeris,Priodontes maximus,Cabassous unicinctus,Pecari tajacu,Tayassu pecari,Dasypus kappleri,Dasypus novemcinctus,Cuniculus paca	8	22
Jaguar	Nascentes da Serra do Cachimbo	Ia	3444	0.0729197	1	57	Brazil	TRUE	Hydrochoerus hydrochaeris,Priodontes maximus,Cabassous unicinctus,Pecari tajacu,Tayassu pecari,Dasypus novemcinctus,Dasypus septemcinctus,Cuniculus paca,Euphractus sexcinctus	9	22
Jaguar	Serra da Cutia	II	2853	1.04582	0.876106	15	Brazil	TRUE	Hydrochoerus hydrochaeris,Priodontes maximus,Cabassous unicinctus,Pecari tajacu,Tayassu pecari,Dasypus kappleri,Dasypus novemcinctus,Cuniculus paca	8	22
Jaguar	Grande Sertão Veredas	II	2322	3.24448	0	22	Brazil	TRUE	Hydrochoerus hydrochaeris,Priodontes maximus,Tolypeutes tricinctus,Cabassous tatouay,Cabassous unicinctus,Pecari tajacu,Tayassu pecari,Dasypus novemcinctus,Dasypus septemcinctus,Cuniculus paca,Euphractus sexcinctus	11	22
Jaguar	Igarapés do Juruena	II	2252	0.121364	1	< 5	Brazil	TRUE	Hydrochoerus hydrochaeris,Priodontes maximus,Cabassous unicinctus,Pecari tajacu,Tayassu pecari,Dasypus kappleri,Dasypus novemcinctus,Cuniculus paca	8	22
Jaguar	Sumapaz	II	2247	6.84217	0	40	Colombia	TRUE	Pecari tajacu,Tayassu pecari,Dasypus kappleri,Dasypus novemcinctus,Cuniculus paca	5	22
Jaguar	IquÃª	Ia	2173	1.32667	0.666667	255	Brazil	TRUE	Hydrochoerus hydrochaeris,Priodontes maximus,Cabassous unicinctus,Pecari tajacu,Tayassu pecari,Dasypus kappleri,Dasypus novemcinctus,Dasypus septemcinctus,Cuniculus paca,Euphractus sexcinctus	10	22
Jaguar	Talampaya	II	2040	2.33188	0.333333	5	Argentina	TRUE	Cabassous chacoensis,Chaetophractus villosus,Chaetophractus vellerosus	3	22
Jaguar	Guajará-Mirim	II	2014	1.06172	0.945946	10	Brazil	TRUE	Hydrochoerus hydrochaeris,Priodontes maximus,Cabassous unicinctus,Pecari tajacu,Tayassu pecari,Dasypus kappleri,Dasypus novemcinctus,Cuniculus paca	8	22
Jaguar	Serra da Canastra	II	1988	4.93524	0	170	Brazil	TRUE	Hydrochoerus hydrochaeris,Priodontes maximus,Cabassous tatouay,Cabassous unicinctus,Pecari tajacu,Tayassu pecari,Dasypus novemcinctus,Dasypus septemcinctus,Cuniculus paca,Euphractus sexcinctus	10	22
Jaguar	Laguna del Diamante	II	1984	2.59399	0	36	Argentina	TRUE	Chaetophractus villosus	1	22
Jaguar	Cuniã	Ia	1866	3.65575	0.0555556	21	Brazil	TRUE	Hydrochoerus hydrochaeris,Priodontes maximus,Cabassous unicinctus,Pecari tajacu,Tayassu pecari,Dasypus kappleri,Dasypus novemcinctus,Cuniculus paca	8	22
Jaguar	Nevado Del Huila	II	1670	6.8516	0	< 5	Colombia	TRUE	Pecari tajacu,Dasypus kappleri,Dasypus novemcinctus,Cuniculus paca	4	22
Jaguar	Catatumbo - Bari	II	1623	6.23312	0	< 5	Colombia	TRUE	Cabassous centralis,Pecari tajacu,Dasypus novemcinctus,Cuniculus paca	4	22
Jaguar	Veredas do Oeste Baiano	III	1288	2.31167	0.361702	60	Brazil	TRUE	Hydrochoerus hydrochaeris,Tolypeutes tricinctus,Cabassous tatouay,Cabassous unicinctus,Pecari tajacu,Tayassu pecari,Dasypus novemcinctus,Dasypus septemcinctus,Cuniculus paca,Euphractus sexcinctus	10	22
Leopard	Dakhla National Park	II	16404	0.670691	0.709476	34	Morocco	FALSE		0	3	Unknown
Leopard	At-Tubayq	III	12245	3.6449	0.135524	139	Saudi Arabia	FALSE		0	3	Present	http://nwrc.gov.sa/NWRC_ARB/mzyd_files/1-2003-007.pdf
Leopard	Banc d'Arguin	II	5473	2.26333	0.110874	34	Mauritania	FALSE		0	3	Unknown
Leopard	Wadi El-Gemal - Hamata	II	4865	2.11155	0.0431655	325	Egypt	FALSE		0	3	Absent	http://pdf.usaid.gov/pdf_docs/PA00J77S.pdf
Leopard	Urumieh lake	II	4423	7.2843	0.166667	53	Iran (Islamic Republic of)	FALSE		0	3	Unknown
Leopard	Khakaborazi	II	4400	1.99336	0.686391	242	Myanmar	FALSE		0	3	Unknown
Leopard	Virachey	II	3399	1.6093	0.676259	< 5	Cambodia	FALSE		0	3	Absent	https://news.mongabay.com/2017/03/the-last-elephants-of-cambodias-virachey-national-park/
Leopard	Cross River	II	3319	5.96663	0	< 5	Nigeria	FALSE	Tragelaphus scriptus	1	3
Leopard	Liuwa Plain	II	3189	4.10498	0	131	Zambia	TRUE	Sylvicapra grimmia,Tragelaphus scriptus	2	3
Leopard	Kirthar	II	2990	6.95066	0	76	Pakistan	FALSE		0	3
Leopard	Al Wusta Wildlife Reserve	II	2845	1.19552	0.765766	271	Oman	FALSE		0	3
Leopard	Digya	II	2789	5.90113	0	40	Ghana	FALSE	Sylvicapra grimmia,Tragelaphus scriptus	2	3
Leopard	Desert	II	2723	5.10711	0	263	India	FALSE		0	3
Leopard	Taba	III	2718	3.74394	0.203704	85	Egypt	FALSE		0	3
Leopard	Old Oyo	II	2385	6.99203	0	85	Nigeria	FALSE	Sylvicapra grimmia,Tragelaphus scriptus	2	3
Leopard	Yangambi	Ia	2246	6.52696	0	215	Democratic Republic of the Congo	TRUE		0	3
Leopard	Parc W Niger	II	2225	5.08104	0	< 5	Niger	FALSE	Sylvicapra grimmia,Tragelaphus scriptus	2	3
Leopard	Fazao-Malfakassa	II	2167	6.06917	0	103	Togo	FALSE	Sylvicapra grimmia,Tragelaphus scriptus	2	3
Leopard	Yankari	II	2148	8.58673	0	216	Nigeria	FALSE	Sylvicapra grimmia,Tragelaphus scriptus	2	3
Leopard	Doi Phukha	II	1911	5.51835	0	< 5	Thailand	FALSE		0	3
Leopard	Bui	II	1897	9.96862	0	62	Ghana	FALSE	Sylvicapra grimmia,Tragelaphus scriptus	2	3
Leopard	Shambe	II	1760	7.4547	0	106	South Sudan	FALSE	Sylvicapra grimmia,Tragelaphus scriptus	2	3
Leopard	Chiang Dao	Ia	1672	6.18293	0	< 5	Thailand	FALSE		0	3
Leopard	Hingol	II	1645	4.22697	0	65	Pakistan	FALSE		0	3
Leopard	Phu Khiew	Ia	1583	6.16893	0	< 5	Thailand	FALSE		0	3
Tiger	Sinyaya	II	12599	1.20778	0.13834	5	Russian Federation	TRUE		0	4	Unknown
Tiger	Olekminsky	Ia	8346	0.034919	0.994048	161	Russian Federation	TRUE		0	4	Unknown
Tiger	Dzhugdzhursky	Ia	7449	1.58912	0.452599	202	Russian Federation	TRUE		0	4	Unknown
Tiger	Ugam-Chatkal	II	6337	11.4366	0	< 5	Uzbekistan	TRUE	Sus scrofa	1	4	Unknown
Tiger	Altai Tavan range	II	6330	5.54399	0	18	Mongolia	FALSE	Sus scrofa	1	4	Unknown
Tiger	Issyk-Kul	Ia	6315	9.33757	0	10	Kyrgyzstan	FALSE	Sus scrofa	1	4	Unknown
Tiger	Lenskie stolby	II	5949	5.21606	0.0114943	5	Russian Federation	TRUE		0	4
Tiger	Urumieh lake	II	4423	7.2843	0	53	Iran (Islamic Republic of)	FALSE	Sus scrofa	1	4
Tiger	Khakaborazi	II	4400	1.99336	0.349112	242	Myanmar	FALSE	Sus scrofa,Rusa unicolor	2	4
Tiger	Shorsky	II	3858	1.68321	0.352941	27	Russian Federation	FALSE		0	4
Tiger	Shey-Phoksundo	II	3611	3.81533	0	35	Nepal	FALSE	Sus scrofa,Rusa unicolor	2	4
Tiger	Bureinsky	Ia	3524	0.138284	0.955882	42	Russian Federation	FALSE	Sus scrofa	1	4
Tiger	Virachey	II	3399	1.6093	0.546763	< 5	Cambodia	FALSE	Sus scrofa,Rusa unicolor	2	4
Tiger	Ele Alatau	II	3115	6.36562	0	< 5	Kazakhstan	FALSE	Sus scrofa	1	4
Tiger	Norsky	Ia	2160	2.44729	0.22619	261	Russian Federation	FALSE		0	4
Tiger	Altun Emel	II	1978	5.7353	0	45	Kazakhstan	FALSE	Sus scrofa	1	4
Tiger	Doi Phukha	II	1911	5.51835	0	< 5	Thailand	FALSE	Sus scrofa,Rusa unicolor	2	4
Tiger	Khangchendzonga	II	1798	4.9844	0.0273973	29	India	TRUE	Sus scrofa,Rusa unicolor	2	4
Tiger	Langtang	II	1665	8.1718	0	20	Nepal	FALSE	Sus scrofa	1	4
Tiger	Alaungdaw	II	1630	7.27171	0	68	Myanmar	FALSE	Sus scrofa,Rusa unicolor	2	4
Tiger	Khao Laem	II	1495	6.59071	0	< 5	Thailand	FALSE	Sus scrofa,Rusa unicolor	2	4
Tiger	Sri Lanna	II	1486	6.10688	0	< 5	Thailand	FALSE	Sus scrofa,Rusa unicolor	2	4
Tiger	Siilxem nuruu /A/, /B/	II	1434	4.55697	0	18	Mongolia	FALSE	Sus scrofa	1	4
Tiger	Preah Monivong (Bokor)	II	1433	5.5437	0	10	Cambodia	FALSE	Sus scrofa,Rusa unicolor	2	4
Tiger	Makalu-Barun	II	1393	6.10186	0	< 5	Nepal	TRUE	Sus scrofa,Rusa unicolor	2	4
Snow leopard	Gobiin baga /A/, /B/	Ib	18315	0.985892	0	60	Mongolia	FALSE	Capra sibirica	1	2	Unknown
Snow leopard	Khangai nuruu	II	9049	5.42853	0	< 5	Mongolia	FALSE	Capra sibirica	1	2	Unknown
Snow leopard	Zed-Khantai-Buteeliin nuruu	Ia	6039	2.70733	0	64	Mongolia	FALSE		0	2	Unknown
Snow leopard	Tarvagatai nuruu	II	5442	5.4062	0	< 5	Mongolia	FALSE	Capra sibirica	1	2	Unknown
Snow leopard	Ulaan Taiga	Ib	4292	1.54878	0	< 5	Mongolia	FALSE		0	2	Unknown
Snow leopard	Myangan-Ugalzat	II	2977	4.90391	0	25	Mongolia	FALSE	Capra sibirica	1	2	Unknown
Snow leopard	Mongol Els	II	2677	0.43297	0.38835	40	Mongolia	FALSE		0	2
Snow leopard	Ulaagchini khar nuur	II	2566	4.13226	0	56	Mongolia	FALSE		0	2
Snow leopard	Khoridol Saridag	Ia	2258	1.65673	0	< 5	Mongolia	FALSE	Capra sibirica	1	2
Snow leopard	Altun Emel	II	1978	5.7353	0	45	Kazakhstan	FALSE		0	2
Snow leopard	Jigme Singye Wangchuck	II	1740	7.62199	0	< 5	Bhutan	FALSE		0	2
Snow leopard	Khakassky	Ia	1345	2.12893	0	27	Russian Federation	FALSE		0	2
Snow leopard	Zag Baidragiin goliin ekhen sav	II	1158	5.11161	0	< 5	Mongolia	FALSE	Capra sibirica	1	2
Snow leopard	Royal Manas	II	1036	10.2052	0	< 5	Bhutan	FALSE		0	2
Snow leopard	Orxoni xundii	II	927	6.23735	0	< 5	Mongolia	FALSE		0	2
Snow leopard	Thrumshingla	II	910	7.05775	0	< 5	Bhutan	FALSE		0	2
Snow leopard	Bulgan gol-Ikh Ongog	II	902	4.78633	0	25	Mongolia	FALSE	Capra sibirica	1	2
Snow leopard	Khorgo Terkh Zagaan nuur	II	848	6.38172	0	20	Mongolia	FALSE		0	2
Snow leopard	Xugnu Tarna	II	841	4.75206	0	55	Mongolia	FALSE		0	2
Snow leopard	Great Himalayan	II	745	8.80143	0	14	India	FALSE		0	2
Snow leopard	Ergaki	II	733	1.31086	0	75	Russian Federation	FALSE		0	2
Snow leopard	Torsa	Ia	613	6.74773	0	16	Bhutan	TRUE	Pseudois nayaur	1	2
Snow leopard	Band-e-Amir	II	598	6.60267	0	231	Afghanistan	FALSE	Capra sibirica	1	2
Snow leopard	Noyon Khangai	II	564	6.0146	0	< 5	Mongolia	FALSE	Capra sibirica	1	2
Snow leopard	Zapadno-Altayskiy	Ia	513	6.0645	0	47	Kazakhstan	FALSE		0	2
Puma	Cordillera Azul	II	13627	3.26569	0.0910959	< 5	Peru	TRUE	Odocoileus virginianus	1	3	Unknown
Puma	Wabakimi Provincial Park	Ib	8906	0.17959	0.917614	< 5	Canada	TRUE	Odocoileus virginianus,Erethizon dorsatum	2	3	Unknown
Puma	Asatiwisipe Aki Traditional Use Planning Area	II	8062	0.227104	0.895833	< 5	Canada	FALSE	Odocoileus virginianus,Erethizon dorsatum	2	3	Unknown
Puma	Algonquin Provincial Park	II	7632	0.721152	0.574257	10	Canada	TRUE	Odocoileus virginianus,Erethizon dorsatum	2	3	Unknown
Puma	Spatsizi Plateau Wilderness Park	Ib	6944	0.0706757	0.963636	< 5	Canada	TRUE	Odocoileus hemionus,Erethizon dorsatum	2	3	Unknown
Puma	Northern Rocky Mountains Park	Ib	6644	0.0877346	0.764045	< 5	Canada	TRUE	Odocoileus hemionus,Erethizon dorsatum	2	3	Unknown
Puma	Quetico Provincial Park (Wilderness Class)	Ib	4718	0.558822	0.663212	< 5	Canada	TRUE	Odocoileus virginianus,Erethizon dorsatum	2	3
Puma	Woodland Caribou Provincial Park (Wilderness Class)	Ib	4700	0.00458695	1	< 5	Canada	TRUE	Odocoileus virginianus,Erethizon dorsatum	2	3
Puma	Opasquia Provincial Park	Ib	4644	0.000443586	0.126984	136	Canada	TRUE	Erethizon dorsatum	1	3
Puma	Atikaki Provincial Park	II	3991	0.426761	0.789809	< 5	Canada	FALSE	Odocoileus virginianus,Erethizon dorsatum	2	3
Puma	Huascarán	II	3418	6.02719	0	64	Peru	FALSE	Odocoileus virginianus	1	3
Puma	Dune Za Keyih Park [a.k.a. Frog-Gataga Park]	Ib	3307	0	0.227273	< 5	Canada	TRUE	Odocoileus hemionus,Erethizon dorsatum	2	3
Puma	Lac La Ronge Provincial Park	II	3193	1.15332	0.59375	14	Canada	FALSE	Erethizon dorsatum	1	3
Puma	Riding Mountain National Park of Canada	II	3087	1.1755	0.152	45	Canada	FALSE	Odocoileus virginianus,Erethizon dorsatum	2	3
Puma	Otishi	II	3079	2.37593	0.00391389	< 5	Peru	TRUE	Odocoileus virginianus	1	3
Puma	Río Abiseo	II	2740	3.74877	0	< 5	Peru	TRUE	Odocoileus virginianus	1	3
Puma	Pauingassi First Nation Traditional Use Planning Area	II	2723	0.0294153	0.981308	< 5	Canada	FALSE	Odocoileus virginianus,Erethizon dorsatum	2	3
Puma	Mount Edziza Park	Ib	2651	0.710093	0.728155	< 5	Canada	TRUE	Odocoileus hemionus,Erethizon dorsatum	2	3
Puma	Stikine River Park	Ib	2569	1.0984	0.72973	< 5	Canada	TRUE	Odocoileus hemionus,Erethizon dorsatum	2	3
Puma	Atlin/A Teix Gi Aan Tlein Park	II	2291	0.0170258	0.979381	< 5	Canada	TRUE	Odocoileus hemionus,Erethizon dorsatum	2	3
Puma	Isle Royale	Ib	2220	3.47691	0	10	United States of America	TRUE		0	3
Puma	Megantoni	III	2169	3.21498	0	< 5	Peru	TRUE	Odocoileus virginianus	1	3
Puma	Pukaskwa National Park of Canada	II	1834	1.406	0.378378	5	Canada	TRUE	Odocoileus virginianus,Erethizon dorsatum	2	3
Puma	Seager Wheeler Lake	Ib	1768	0	1	25	Canada	FALSE	Erethizon dorsatum	1	3
Puma	Lake Nipigon Conservation Reserve	II	1754	1.23267	0.402439	< 5	Canada	TRUE	Odocoileus virginianus,Erethizon dorsatum	2	3
Spotted hyena	Maiko	II	11042	2.95309	0	92	Democratic Republic of the Congo	TRUE		0	1	Unknown
Spotted hyena	Bomu	Ib	6590	2.44476	0	28	Democratic Republic of the Congo	FALSE		0	1	Unknown
Spotted hyena	Ai-Ais Hot Springs	II	4370	2.38729	0.0344828	135	Namibia	FALSE	Oryx gazella	1	1	Unknown
Spotted hyena	Cross River	II	3319	5.96663	0	< 5	Nigeria	FALSE		0	1	Unknown
Spotted hyena	Mpem et Djim	II	981	3.91395	0	67	Cameroon	FALSE		0	1	Unknown
Spotted hyena	Takamanda	II	632	6.15187	0	< 5	Cameroon	FALSE		0	1	Unknown
Spotted hyena	Matopos	II	413	8.51214	0	174	Zimbabwe	FALSE		0	1
Spotted hyena	Waterberg Plateau Park	II	398	1.6587	0	110	Namibia	FALSE	Oryx gazella	1	1
Spotted hyena	Pomene	II	127	9.81073	0	310	Mozambique	FALSE		0	1
Spotted hyena	Mlilwane Wildlife Sanctuary	II	46	13.6317	0	25	Swaziland	FALSE		0	1
Spotted hyena	Daan Viljoen Game Park	II	40	10.3415	0	122	Namibia	FALSE	Oryx gazella	1	1
Brown hyena	National Park Luengue-Luiana	II	10494	2.82897	0.125301	< 5	Angola	TRUE		0	0	Unknown	https://www.panthera.org/cms/sites/default/files/The%20Distribution%20and%20Status%20of%20Lions%20and%20Other%20Large%20Carnivores%20in%20Luengue-Luiana%20and%20Mavinga%20National%20Parks%2C%20Angola.pdf	Recently photographed in a nearby area
Brown hyena	National Park Quiçama	II	8641	5.80882	0	240	Angola	FALSE		0	0	Unknown
Brown hyena	Sioma Ngwezi	II	4477	4.56516	0	< 5	Zambia	TRUE		0	0	Unknown
Brown hyena	Mudumu	II	720	2.57643	0.241379	18	Namibia	TRUE		0	0	Unknown
Brown hyena	Nkasa Rupara	II	340	2.46804	0.363636	10	Namibia	TRUE		0	0	Unknown
Brown hyena	Kasane	II	146	6.84559	0	< 5	Botswana	FALSE		0	0	Unknown
Brown hyena	Mosi-Oa-Tunya	II	81	15.1829	0	5	Zambia	FALSE		0	0
Striped hyena	Manovo-Gounda-Saint Floris	II	19092	1.71458	0.44016	61	Central African Republic	TRUE		0	0	Unknown
Striped hyena	'Uruq Bani Ma'arid	II	12714	3.51204	0.240557	391	Saudi Arabia	FALSE		0	0	Unknown
Striped hyena	Kahuzi-Biega	II	6776	5.67799	0	92	Democratic Republic of the Congo	FALSE		0	0	Unknown
Striped hyena	Langtang	II	1665	8.1718	0	20	Nepal	FALSE		0	0	Unknown
Striped hyena	Kishtwar	II	1522	4.33796	0	52	India	FALSE		0	0	Unknown
Striped hyena	Akagera	II	1027	9.89271	0	78	Rwanda	FALSE		0	0	Unknown
Striped hyena	Sundarban	II	972	8.51952	0	80	India	FALSE		0	0
Striped hyena	Andre Felix	II	958	2.48474	0.583333	106	Central African Republic	FALSE		0	0
Striped hyena	Great Himalayan	II	745	8.80143	0	14	India	FALSE		0	0
Striped hyena	Amu-Darya	Ia	619	10.5479	0	90	Turkmenistan	FALSE		0	0
Striped hyena	Borjomi-Kharagauli	II	588	9.56984	0	< 5	Georgia	FALSE		0	0
Striped hyena	Papikonda	II	535	9.91577	0	150	India	FALSE		0	0
Striped hyena	Tigrovaya Balka	Ia	518	14.4214	0	111	Tajikistan	FALSE		0	0
Striped hyena	Simlipal	II	419	17.4042	0	226	India	FALSE		0	0
Striped hyena	Dilijan	II	393	10.0696	0	47	Armenia	FALSE		0	0
Striped hyena	Lake Mburo	II	369	4.86496	0	87	Uganda	FALSE		0	0
Striped hyena	Dashtidjum	Ia	368	13.6976	0	119	Tajikistan	FALSE		0	0
Striped hyena	Zaamin	II	363	10.6295	0	< 5	Uzbekistan	FALSE		0	0
Striped hyena	Dachigam	II	333	12.3621	0	81	India	FALSE		0	0
Striped hyena	Shirkent historical and natural park	II	317	9.6853	0	51	Tajikistan	FALSE		0	0
Striped hyena	Kolkheti	II	293	11.5215	0	30	Georgia	FALSE		0	0
Striped hyena	Khosrov Forest	Ia	229	12.7706	0	50	Armenia	FALSE		0	0
Striped hyena	Kanger Valley	II	228	11.1217	0	124	India	FALSE		0	0
Striped hyena	Tbilisi	II	220	11.3915	0	30	Georgia	FALSE		0	0
Striped hyena	Lake Arpi	II	212	14.766	0	< 5	Armenia	FALSE		0	0
Sun bear	Jigme Singye Wangchuck	II	1740	7.62199	0	< 5	Bhutan	FALSE		0	0	Unknown
Sun bear	Sri Lanna	II	1486	6.10688	0	< 5	Thailand	FALSE		0	0	Unknown
Sun bear	Doi Luang	II	1318	7.69044	0	< 5	Thailand	FALSE		0	0	Present	https://en.wikipedia.org/wiki/Doi_Luang_National_Park
Sun bear	Thung Salaeng Luang	II	1276	6.92859	0.24	< 5	Thailand	FALSE		0	0	Unknown
Sun bear	Khao Bantad	Ia	1252	8.57713	0	< 5	Thailand	FALSE		0	0	Unknown
Sun bear	Tham Phathai	II	1252	5.76801	0.16	< 5	Thailand	FALSE		0	0	Unknown
Sun bear	Yok Don	II	1070	8.40553	0.097561	60	Viet Nam	FALSE		0	0	Present	https://books.google.com/books?id=dTD_AQAAQBAJ&pg=PA342&lpg=PA342&dq=%22Yok+Don%22+sun+bear&source=bl&ots=EVzIgkYDnP&sig=0qd17Bn3H4tW5qfG6Q8D_s07PZ0&hl=en&sa=X&ved=0ahUKEwjHwdKk8OjUAhUG-2MKHWs8CCAQ6AEIKDAA#v=onepage&q=%22Yok%20Don%22%20sun%20bear&f=false
Sun bear	Royal Manas	II	1036	10.2052	0	< 5	Bhutan	FALSE		0	0	Unknown
Sun bear	Si Nan	II	1003	7.20466	0.0512821	< 5	Thailand	FALSE		0	0
Sun bear	Mae Tho	II	1000	7.62985	0.225	< 5	Thailand	FALSE		0	0
Sun bear	Thrumshingla	II	910	7.05775	0	< 5	Bhutan	FALSE		0	0
Sun bear	Nunthaburi	II	870	6.13488	0.1875	< 5	Thailand	FALSE		0	0
Sun bear	Phu Pa - Yol (Huai Huat)	II	798	8.84185	0	5	Thailand	FALSE		0	0
Sun bear	Chae Son	II	787	6.45137	0	< 5	Thailand	FALSE		0	0
Sun bear	Khao Pu - Khao Ya	II	714	11.2379	0	< 5	Thailand	FALSE		0	0
Sun bear	Phu Phan	II	713	10.2972	0	< 5	Thailand	FALSE		0	0
Sun bear	Lam Nam Kok	II	708	11.608	0	< 5	Thailand	FALSE		0	0
Sun bear	Nam Yung Nam Som	II	695	9.72944	0	50	Thailand	FALSE		0	0
Sun bear	Phu Chong - Na Yoi	II	693	6.66613	0.04	< 5	Thailand	FALSE		0	0
Sun bear	Ob Luang	II	689	9.94438	0.0714286	< 5	Thailand	FALSE		0	0
Sun bear	Tham Pla - Pha Seu	II	661	4.99911	0.68	< 5	Thailand	FALSE		0	0
Sun bear	Chu Yang Sin	II	607	4.73262	0.68	18	Viet Nam	FALSE		0	0
Sun bear	Doi Phamuang	Ia	593	5.88721	0.0833333	5	Thailand	FALSE		0	0
Sun bear	Mae Wa	II	583	6.30747	0.130435	< 5	Thailand	FALSE		0	0
Sun bear	Khao Luang	II	580	8.29344	0	< 5	Thailand	FALSE		0	0
Sloth bear	Jigme Singye Wangchuck	II	1740	7.62199	0.289855	< 5	Bhutan	FALSE		0	0	Unknown
Sloth bear	Sundarban	II	972	8.51952	0.818182	80	India	FALSE		0	0	Unknown
Sloth bear	Dudhwa	II	719	19.2897	0	25	India	FALSE		0	0	Present	https://en.wikipedia.org/wiki/Dudhwa_National_Park
Sloth bear	Mouling	II	437	5.61732	0.764706	225	India	FALSE		0	0	Unknown
Sloth bear	Knuckles	Ia	315	11.7763	0	16	Sri Lanka	FALSE		0	0	Unknown
Sloth bear	Peak Wilderness NR	Ia	136	8.77734	1	27	Sri Lanka	FALSE		0	0	Unknown
Sloth bear	Sinharaja National Heritage Wilderness Area	Ia	115	9.87815	0.5	20	Sri Lanka	FALSE		0	0	Unknown
Sloth bear	Shivapuri-Nagarjun	II	108	15.629	0	20	Nepal	FALSE		0	0
Sloth bear	Neora Valley	II	93	10.0198	0.5	21	India	FALSE		0	0
Sloth bear	Pedro Forest/Pidurutalagala	Ia	77	12.2772	0	< 5	Sri Lanka	FALSE		0	0
Sloth bear	Kaudulla	II	67	12.7906	0	< 5	Sri Lanka	FALSE		0	0
Sloth bear	Bundala	II	51	16.2216	0	11	Sri Lanka	FALSE		0	0
Sloth bear	Ilukpelessa	Ib	40	8.93165	1	< 5	Sri Lanka	FALSE		0	0
Sloth bear	Mulatiyana	Ib	36	12.1938	0	20	Sri Lanka	FALSE		0	0
Sloth bear	Mihintale	Ib	33	16.7798	0	5	Sri Lanka	FALSE		0	0
Sloth bear	Yagirala	Ib	30	11.5634	0.5	20	Sri Lanka	FALSE		0	0
Sloth bear	Baroiyadhala	II	29	20.3442	0	47	Bangladesh	FALSE		0	0
Sloth bear	Tengragiri	II	28	15.199	0	14	Bangladesh	FALSE		0	0
Sloth bear	Nuwaragama	Ib	28	14.7442	0	5	Sri Lanka	FALSE		0	0
Sloth bear	Tumbikulama	Ib	28	13.915	0	5	Sri Lanka	FALSE		0	0
Sloth bear	Kandapola	Ia	27	14.1657	0	< 5	Sri Lanka	FALSE		0	0
Sloth bear	Yodaela	Ib	25	8.23668	1	10	Sri Lanka	FALSE		0	0
Andean black bear	Darién	II	5701	4.61777	0.103448	< 5	Panama	TRUE		0	0	Unknown
Andean black bear	Huascarán	II	3418	6.02719	0.0292683	64	Peru	FALSE		0	0	Present	https://en.wikipedia.org/wiki/Huascar%C3%A1n_National_Park
Andean black bear	Tinigua	II	2167	3.79886	0.0588235	< 5	Colombia	TRUE		0	0	Unknown
Andean black bear	Los Katios	II	814	5.85961	0	< 5	Colombia	TRUE		0	0	Present	http://www.colombia.co/en/visit-colombia/unique-places/los-katios-national-park/
Andean black bear	Cerro Saroche	II	693	9.66452	0	5	Venezuela, Bolivarian Republic of	FALSE		0	0	Unknown
Andean black bear	La Tatacoa	II	361	11.7119	0	27	Colombia	FALSE		0	0	Unknown
Andean black bear	Serrania De Minas	II	293	12.6441	0	15	Colombia	TRUE		0	0	Unknown
Andean black bear	Pampa Hermosa	III	116	7.92129	0	45	Peru	FALSE		0	0	Unknown
Andean black bear	Cutervo	II	83	8.64475	0	85	Peru	FALSE		0	0
Andean black bear	Rabanal En El Municipio De Samaca	II	46	9.59973	0	45	Colombia	TRUE		0	0
Andean black bear	Calipuy	III	45	5.39913	0	64	Peru	FALSE		0	0
Andean black bear	Ampay	III	39	14.4374	0	21	Peru	FALSE		0	0
Andean black bear	Parque Natural Regional Cerro La Judia	II	35	23.879	0	5	Colombia	TRUE		0	0
Andean black bear	Parque Natural Regional San Miguel De Los Farallones	II	34	6.14656	0	35	Colombia	FALSE		0	0
Andean black bear	Loma de León	III	29	16.9495	0	5	Venezuela, Bolivarian Republic of	FALSE		0	0
Andean black bear	Sector Oriental Serrania El Peligro	II	27	11.998	0	45	Colombia	TRUE		0	0
American black bear	Grasslands National Park of Canada	II	526	2.01647	0.809524	118	Canada	FALSE		0	0	Unknown
American black bear	Moose Mountain Provincial Park	II	402	1.13452	0.833333	136	Canada	FALSE		0	0	Unknown
American black bear	Great Sand Hills	Ib	373	0.415299	1	69	Canada	FALSE		0	0	Unknown
American black bear	Spruce Woods Provincial Park	II	213	2.19823	0.833333	10	Canada	FALSE		0	0	Unknown
American black bear	Bob Creek Wildland	Ib	208	2.47036	0.444444	5	Canada	TRUE		0	0	Unknown
American black bear	Cypress Hills	II	207	3.2337	0.461538	< 5	Canada	FALSE		0	0	Unknown
American black bear	Elk Island National Park of Canada	II	193	6.20602	0	90	Canada	FALSE		0	0
American black bear	Cypress Hills Provincial Park	II	183	2.82866	0.4	< 5	Canada	FALSE		0	0
American black bear	Turtle Mountain Provincial Park	II	120	1.78575	0.714286	10	Canada	FALSE		0	0
American black bear	Douglas Provincial Park	II	97	4.84923	0	137	Canada	FALSE		0	0
American black bear	Douglas Marsh Protected Area	II	84	3.33107	0.25	10	Canada	FALSE		0	0
American black bear	Dinosaur	Ia	81	2.32371	0.333333	127	Canada	FALSE		0	0
American black bear	Saskatchewan Landing Provincial Park	II	72	6.42791	0	90	Canada	FALSE		0	0
American black bear	Whitemud Watershed Wildlife Management Area	III	66	5.00206	0	15	Canada	FALSE		0	0
American black bear	Milk River	Ia	55	1.03834	1	47	Canada	FALSE		0	0
American black bear	Neys Provincial Park (Natural Environment Class)	II	55	10.7099	0	16	Canada	FALSE		0	0
American black bear	Gateway	II	49	36.9952	0	418	United States of America	FALSE		0	0
American black bear	North Channel Inshore Provincial Park (Waterway Class)	II	38	9.97326	0	14	Canada	FALSE		0	0
American black bear	Biscayne	II	38	7	0	< 5	United States of America	FALSE		0	0
American black bear	Rondeau Provincial Park	II	33	8.67562	0	85	Canada	FALSE		0	0
American black bear	Crimson Lake	II	32	7.08326	0	81	Canada	TRUE		0	0
American black bear	Whitewater Lake Wildlife Management Area	III	28	1.61654	1	10	Canada	FALSE		0	0
American black bear	Writing-On-Stone	II	27	5.23819	0	85	Canada	FALSE		0	0
Brown bear	Ukkusiksalik National Park of Canada	II	17580	0	0.820024	99	Canada	TRUE		0	0	Present	https://en.wikipedia.org/wiki/Ukkusiksalik_National_Park
Brown bear	Khangai nuruu	II	9049	5.42853	0	< 5	Mongolia	FALSE		0	0	Unknown
Brown bear	Har Us Nuur	II	8600	2.75637	0.14956	40	Mongolia	FALSE		0	0	Unknown
Brown bear	Asatiwisipe Aki Traditional Use Planning Area	II	8062	0.227104	0.895833	< 5	Canada	FALSE		0	0	Unknown
Brown bear	Tarvagatai nuruu	II	5442	5.4062	0	< 5	Mongolia	FALSE		0	0	Unknown
Brown bear	Kaplangurskiy	Ia	5237	5.77917	0	199	Turkmenistan	FALSE		0	0	Unknown
Brown bear	Eastern Mongolian Steppe	Ib	5029	6.92392	0	208	Mongolia	FALSE		0	0	Unknown	https://en.wikipedia.org/wiki/Eurasian_Steppe
Brown bear	Kavir	II	4440	5.37941	0	100	Iran (Islamic Republic of)	FALSE		0	0
Brown bear	Uvs Nuur Basin	Ia	4417	4.15472	0	34	Mongolia	FALSE		0	0
Brown bear	Atikaki Provincial Park	II	3991	0.426761	0.394904	< 5	Canada	FALSE		0	0
Brown bear	Prince Albert National Park of Canada	II	3948	0.590488	0.853333	25	Canada	TRUE		0	0
Brown bear	Olympic	II	3697	1.37739	0.510067	30	United States of America	FALSE		0	0
Brown bear	Pink Lake	Ib	3665	0	1	55	Canada	TRUE		0	0
Brown bear	Shey-Phoksundo	II	3611	3.81533	0.00694444	35	Nepal	FALSE		0	0
Brown bear	Numaykoos Lake Provincial Park	Ib	3595	0.00131722	1	25	Canada	TRUE		0	0
Brown bear	Khan Khukhii-Khyragas Lake	II	3501	2.59987	0.277372	14	Mongolia	FALSE		0	0
Brown bear	Hardangervidda	II	3421	2.74605	0.102941	10	Norway	FALSE		0	0
Brown bear	Lac La Ronge Provincial Park	II	3193	1.15332	0.664062	14	Canada	FALSE		0	0
Brown bear	Numrug	Ib	3116	6.96496	0	250	Mongolia	FALSE		0	0
Brown bear	Riding Mountain National Park of Canada	II	3087	1.1755	0.672	45	Canada	FALSE		0	0
Brown bear	Myangan-Ugalzat	II	2977	4.90391	0	25	Mongolia	FALSE		0	0
Brown bear	Pauingassi First Nation Traditional Use Planning Area	II	2723	0.0294153	0.457944	< 5	Canada	FALSE		0	0
Brown bear	Mongol Els	II	2677	0.43297	0.864078	40	Mongolia	FALSE		0	0
Brown bear	Ix Bogd mountain	II	2623	1.97511	0.368932	35	Mongolia	FALSE		0	0
Brown bear	Podolskie Tovtry	II	2590	15.4924	0	< 5	Ukraine	FALSE		0	0
Asiatic black bear	Tajik National Park	II	23358	4.58404	0.021978	50	Tajikistan	FALSE		0	0	Unknown
Asiatic black bear	Taman Negara	II	4542	2.38691	0.95082	113	Malaysia	FALSE		0	0	Unknown
Asiatic black bear	Hemis	II	3494	2.68754	0.114286	52	India	TRUE		0	0	Unknown
Asiatic black bear	Khunjerab	II	3341	6.65141	0	103	Pakistan	FALSE		0	0	Unknown
Asiatic black bear	Kirthar	II	2990	6.95066	0	76	Pakistan	FALSE		0	0	Present	https://en.wikipedia.org/wiki/Fauna_of_Sindh
Asiatic black bear	Sri Lanna	II	1486	6.10688	0	< 5	Thailand	FALSE		0	0	Present	http://www.chiangmai-chiangrai.com/national-parks_sri-lanna.html
Asiatic black bear	Endau Rompin (Johor)	II	1330	3.2374	0.807692	43	Malaysia	FALSE		0	0	Unknown
Asiatic black bear	Doi Luang	II	1318	7.69044	0	< 5	Thailand	FALSE		0	0	Present	https://en.wikipedia.org/wiki/Doi_Luang_National_Park
Asiatic black bear	Thung Salaeng Luang	II	1276	6.92859	0	< 5	Thailand	FALSE		0	0	Unknown	https://en.wikipedia.org/wiki/Thung_Salaeng_Luang_National_Park
Asiatic black bear	Khao Bantad	Ia	1252	8.57713	0	< 5	Thailand	FALSE		0	0
Asiatic black bear	Tham Phathai	II	1252	5.76801	0	< 5	Thailand	FALSE		0	0
Asiatic black bear	Chitwan	II	1218	14.5669	0	54	Nepal	TRUE		0	0
Asiatic black bear	Mae Charim	II	1109	5.1982	0.2	< 5	Thailand	FALSE		0	0
Asiatic black bear	Yok Don	II	1070	8.40553	0.0243902	60	Viet Nam	FALSE		0	0
Asiatic black bear	Bolon'sky	Ia	1054	0.501703	1	102	Russian Federation	FALSE		0	0
Asiatic black bear	Si Nan	II	1003	7.20466	0.025641	< 5	Thailand	FALSE		0	0
Asiatic black bear	Mae Tho	II	1000	7.62985	0.025	< 5	Thailand	FALSE		0	0
Asiatic black bear	Bardia	II	900	13.1997	0	< 5	Nepal	FALSE		0	0
Asiatic black bear	Nunthaburi	II	870	6.13488	0	< 5	Thailand	FALSE		0	0
Asiatic black bear	Phu Pa - Yol (Huai Huat)	II	798	8.84185	0	5	Thailand	FALSE		0	0
Asiatic black bear	Rajaji	II	796	16.9809	0	49	India	FALSE		0	0
Asiatic black bear	Chae Son	II	787	6.45137	0	< 5	Thailand	FALSE		0	0
Asiatic black bear	Khao Pu - Khao Ya	II	714	11.2379	0	< 5	Thailand	FALSE		0	0
Asiatic black bear	Phu Phan	II	713	10.2972	0	< 5	Thailand	FALSE		0	0
Asiatic black bear	Lam Nam Kok	II	708	11.608	0	< 5	Thailand	FALSE		0	0

## Sheet: Table S3. region table
Species	Region ID	Area (km2)	Footprint	% Protected	Country	Guild	Prey	Number of prey	Total prey
African wild dog	1	374975	0.177947	0	Niger	FALSE		0	5
African wild dog	2	366500	0.291656	0.00259209	Mauritania	FALSE		0	5
African wild dog	3	224950	0.312259	0	Mali	FALSE		0	5
African wild dog	4	92575	0.283413	0	Central African Republic	FALSE	Tragelaphus scriptus	1	5
African wild dog	5	27975	0.443244	0	Chad	FALSE		0	5
African wild dog	6	18500	0.265084	0.662162	Namibia	FALSE		0	5
African wild dog	7	17750	0.165746	0	Chad	FALSE		0	5
African wild dog	8	16675	0.0971979	0	Mali	FALSE		0	5
African wild dog	9	16225	0.48044	0	Namibia	FALSE		0	5
African wild dog	10	15825	0.232657	0.911532	Namibia	FALSE		0	5
African wild dog	11	14500	0.635522	0	Mali	FALSE		0	5
African wild dog	12	12425	0.310827	0.0120724	Central African Republic	FALSE	Tragelaphus scriptus	1	5
African wild dog	13	10700	1.10118	0	Angola	FALSE	Tragelaphus scriptus,Tragelaphus strepsiceros	2	5
African wild dog	14	10275	0.645135	0.22871	Mozambique	FALSE	Tragelaphus scriptus,Tragelaphus strepsiceros,Aepyceros melampus	3	5
African wild dog	15	9350	0.420217	0.564171	Botswana	FALSE		0	5
African wild dog	16	9300	0.172184	0	Central African Republic	FALSE	Tragelaphus scriptus	1	5
African wild dog	17	8100	0.531565	0	Namibia	FALSE	Tragelaphus strepsiceros	1	5
African wild dog	18	7525	1.12248	0.428571	Angola	FALSE	Tragelaphus scriptus,Tragelaphus strepsiceros	2	5
African wild dog	19	6075	0.866835	0	Kenya	FALSE	Tragelaphus imberbis,Tragelaphus strepsiceros	2	5
African wild dog	20	6050	1.13617	0	Angola	FALSE	Tragelaphus scriptus,Tragelaphus strepsiceros	2	5
African wild dog	21	6025	0.575006	0.0705394	Botswana	FALSE	Tragelaphus strepsiceros	1	5
African wild dog	22	5850	0.35796	0	Namibia	FALSE		0	5
African wild dog	23	5675	1.10689	0	Angola	FALSE	Tragelaphus strepsiceros	1	5
African wild dog	24	5650	1.07963	0	Angola	FALSE	Tragelaphus scriptus	1	5
African wild dog	25	5625	1.09697	0	Sudan	FALSE		0	5
American black bear	1	15125	1.16707	0.00495868	United States of America	FALSE		0	0
American black bear	2	12825	1.23619	0	United States of America	FALSE		0	0
American black bear	3	9925	1.49202	0.0428212	Canada	FALSE		0	0
American black bear	4	8125	2.08578	0	Mexico	FALSE		0	0
American black bear	5	5875	1.39948	0	United States of America	FALSE		0	0
American black bear	6	5775	1.62607	0	United States of America	FALSE		0	0
American black bear	7	5750	1.40303	0	United States of America	FALSE		0	0
American black bear	8	5675	1.53541	0	Mexico	FALSE		0	0
American black bear	9	5650	1.41318	0	United States of America	FALSE		0	0
American black bear	10	4950	2.0176	0	United States of America	FALSE		0	0
American black bear	11	4700	1.04983	0.0957447	Canada	FALSE		0	0
American black bear	12	4650	0.79361	0	Canada	FALSE		0	0
American black bear	13	4200	1.11581	0	United States of America	FALSE		0	0
American black bear	14	3850	1.37325	0	United States of America	FALSE		0	0
American black bear	15	3400	0.86992	0	United States of America	FALSE		0	0
American black bear	16	3325	0.916276	0.075188	Canada	FALSE		0	0
American black bear	17	3000	1.22384	0	United States of America	FALSE		0	0
American black bear	18	2725	1.20947	0	United States of America	FALSE		0	0
American black bear	19	2700	1.97398	0	United States of America	FALSE		0	0
American black bear	20	2675	2.14261	0	Mexico	FALSE		0	0
American black bear	21	2650	0.843488	0	Canada	FALSE		0	0
American black bear	22	2650	1.69068	0	United States of America	FALSE		0	0
American black bear	23	2650	1.52492	0	United States of America	FALSE		0	0
American black bear	24	2575	0.777853	0	Canada	FALSE		0	0
American black bear	25	2575	1.01201	0	United States of America	FALSE		0	0
Andean black bear	1	15175	1.40506	0.0807249	Peru	FALSE		0	0
Andean black bear	2	8275	1.06705	0.356495	Bolivia (Plurinational State of)	FALSE		0	0
Andean black bear	3	7300	0.962978	0	Bolivia (Plurinational State of)	FALSE		0	0
Andean black bear	4	4750	0.562352	0.978947	Peru	FALSE		0	0
Andean black bear	5	4500	1.26781	0	Peru	FALSE		0	0
Andean black bear	6	3825	1.10909	0	Peru	FALSE		0	0
Andean black bear	7	3200	1.7312	0	Peru	FALSE		0	0
Andean black bear	8	2250	1.25117	0.666667	Peru	FALSE		0	0
Andean black bear	9	1900	1.33614	0.315789	Peru	FALSE		0	0
Andean black bear	10	1700	1.61431	0.867647	Peru	TRUE		0	0
Andean black bear	11	1525	1.23929	0	Peru	FALSE		0	0
Andean black bear	12	1500	1.43005	0.283333	Peru	FALSE		0	0
Andean black bear	13	1425	1.43385	0	Bolivia (Plurinational State of)	TRUE		0	0
Andean black bear	14	1425	1.58166	0	Bolivia (Plurinational State of)	FALSE		0	0
Andean black bear	15	1400	1.37768	0.517857	Colombia	TRUE		0	0
Andean black bear	16	1375	1.40649	0	Bolivia (Plurinational State of)	FALSE		0	0
Andean black bear	17	1250	1.37989	0	Peru	FALSE		0	0
Andean black bear	18	1150	0.90947	0	Ecuador	FALSE		0	0
Andean black bear	19	1075	1.31419	0	Ecuador	TRUE		0	0
Andean black bear	20	1075	1.38804	0	Peru	FALSE		0	0
Andean black bear	21	875	2.02687	0	Peru	FALSE		0	0
Andean black bear	22	825	1.4182	0	Ecuador	FALSE		0	0
Andean black bear	23	725	0.951456	0	Ecuador	FALSE		0	0
Andean black bear	24	725	1.17911	0.655172	Peru	FALSE		0	0
Andean black bear	25	725	1.44157	0	Bolivia (Plurinational State of)	FALSE		0	0
Asiatic black bear	1	130825	2.6572	0	Pakistan	FALSE		0	0
Asiatic black bear	2	114225	1.2503	0.00984898	Russian Federation	FALSE		0	0
Asiatic black bear	3	16075	0.309005	0	Russian Federation	FALSE		0	0
Asiatic black bear	4	11925	1.97269	0.36478	Malaysia	FALSE		0	0
Asiatic black bear	5	11325	3.46482	0	Pakistan	FALSE		0	0
Asiatic black bear	6	8450	2.07211	0.00295858	Cambodia	FALSE		0	0
Asiatic black bear	7	7125	1.18411	0	Tajikistan	FALSE		0	0
Asiatic black bear	8	7025	3.273	0	China	FALSE		0	0
Asiatic black bear	9	6600	4.12048	0	Pakistan	FALSE		0	0
Asiatic black bear	10	5600	4.12278	0	Pakistan	FALSE		0	0
Asiatic black bear	11	5600	2.82337	0	Lao People's Democratic Republic	FALSE		0	0
Asiatic black bear	12	5325	2.17964	0	Malaysia	FALSE		0	0
Asiatic black bear	13	4950	2.34388	0.0353535	Cambodia	FALSE		0	0
Asiatic black bear	14	4850	4.02785	0	Pakistan	FALSE		0	0
Asiatic black bear	15	4775	4.07014	0	Pakistan	FALSE		0	0
Asiatic black bear	16	3950	2.6495	0	Cambodia	FALSE		0	0
Asiatic black bear	17	3850	1.48015	0	China	FALSE		0	0
Asiatic black bear	18	3650	4.12478	0	Iran (Islamic Republic of)	FALSE		0	0
Asiatic black bear	19	3350	3.30032	0	Iran (Islamic Republic of)	FALSE		0	0
Asiatic black bear	20	2900	1.10322	0	China	FALSE		0	0
Asiatic black bear	21	2875	3.0286	0	Myanmar	FALSE		0	0
Asiatic black bear	22	2850	3.30566	0	Cambodia	FALSE		0	0
Asiatic black bear	23	2775	3.34338	0	China	FALSE		0	0
Asiatic black bear	24	2575	3.3562	0.213592	Myanmar	FALSE		0	0
Asiatic black bear	25	2425	3.31897	0	Afghanistan	FALSE		0	0
Brown bear	1	292025	0.0544899	0.0838969	Canada	FALSE		0	0
Brown bear	2	279825	0.0156315	0.061467	Canada	TRUE		0	0
Brown bear	3	194625	0.146535	0	China	FALSE		0	0
Brown bear	4	61050	0.0423374	0.123669	Canada	TRUE		0	0
Brown bear	5	59775	0.11654	0	China	FALSE		0	0
Brown bear	6	49325	0.0331302	0.178409	Canada	FALSE		0	0
Brown bear	7	24975	0.0278823	0.0620621	Canada	FALSE		0	0
Brown bear	8	24425	0.153207	0	China	FALSE		0	0
Brown bear	9	22825	0.116144	0	Russian Federation	TRUE		0	0
Brown bear	10	22425	0.11516	0.0156076	Canada	TRUE		0	0
Brown bear	11	20350	0.490235	0	China	FALSE		0	0
Brown bear	12	15950	0.137953	0.117555	Canada	FALSE		0	0
Brown bear	13	15600	0.152139	0	United States of America	FALSE		0	0
Brown bear	14	14975	0.195186	0	China	FALSE		0	0
Brown bear	15	12225	0.192075	0.0388548	Canada	FALSE		0	0
Brown bear	16	11900	0.214823	0	China	FALSE		0	0
Brown bear	17	11575	0.19904	0	Canada	FALSE		0	0
Brown bear	18	11550	0.111707	0	China	FALSE		0	0
Brown bear	19	11025	0.911068	0.213152	China	FALSE		0	0
Brown bear	20	10575	0.185626	0	United States of America	TRUE		0	0
Brown bear	21	10400	0.0374713	0	Russian Federation	TRUE		0	0
Brown bear	22	10250	0.156011	0	China	FALSE		0	0
Brown bear	23	10025	0.0757026	0	Russian Federation	TRUE		0	0
Brown bear	24	9700	0.057069	0	Russian Federation	TRUE		0	0
Brown bear	25	9200	0.207581	0	Mongolia	FALSE		0	0
Brown hyena	1	28000	0.829998	0.123214	Botswana	FALSE		0	0
Brown hyena	2	8500	0.618143	0	Namibia	FALSE		0	0
Brown hyena	3	2625	1.3358	0	Angola	FALSE		0	0
Brown hyena	4	2300	0.670179	0	Namibia	FALSE		0	0
Brown hyena	5	1950	1.28925	0.525641	Angola	FALSE		0	0
Brown hyena	6	1950	0.591851	0	Namibia	FALSE		0	0
Brown hyena	7	1300	0.646021	0	Namibia	FALSE		0	0
Brown hyena	8	1200	1.38063	0	Mozambique	FALSE		0	0
Brown hyena	9	1000	0.712314	0	Namibia	TRUE		0	0
Brown hyena	10	975	0.352959	0	Namibia	FALSE		0	0
Brown hyena	11	925	1.83326	0	Mozambique	FALSE		0	0
Brown hyena	12	925	1.2093	0	Namibia	FALSE		0	0
Brown hyena	13	900	0.700312	0	Namibia	FALSE		0	0
Brown hyena	14	825	2.00015	0	Namibia	FALSE		0	0
Brown hyena	15	800	0.399889	0	Namibia	FALSE		0	0
Brown hyena	16	775	1.4638	0	Mozambique	FALSE		0	0
Brown hyena	17	725	0.993338	0	Namibia	FALSE		0	0
Brown hyena	18	700	1.42159	1	Botswana	TRUE		0	0
Brown hyena	19	600	0.992089	0	Namibia	FALSE		0	0
Brown hyena	20	575	0.556981	0	Namibia	FALSE		0	0
Brown hyena	21	575	0.755299	0	South Africa	FALSE		0	0
Brown hyena	22	550	1.38813	0	Botswana	FALSE		0	0
Brown hyena	23	525	0.759149	0	South Africa	FALSE		0	0
Brown hyena	24	450	1.60259	0	Mozambique	FALSE		0	0
Brown hyena	25	400	0.862645	0	Mozambique	FALSE		0	0
Cheetah	1	720000	0.000514595	6.94444e-05	Niger	FALSE		0	5
Cheetah	2	392550	0.00120673	0	Algeria	FALSE		0	5
Cheetah	3	303825	0.000884782	0	Mauritania	FALSE		0	5
Cheetah	4	120775	0.00186198	0	Libya	TRUE		0	5
Cheetah	5	112025	0.00355507	0	Chad	FALSE		0	5
Cheetah	6	98475	0.00172764	0	Mali	FALSE		0	5
Cheetah	7	93625	0.00117226	0	Egypt	FALSE		0	5
Cheetah	8	82000	0.00143067	0	Algeria	FALSE		0	5
Cheetah	9	79675	0.00143948	0	Libya	TRUE		0	5
Cheetah	10	59500	0.00142019	0.0155462	Mauritania	FALSE		0	5
Cheetah	11	49925	0.00256641	0	Libya	TRUE		0	5
Cheetah	12	47950	0.0019135	0	Central African Republic	FALSE		0	5
Cheetah	13	47275	0.00317431	0	Yemen	FALSE		0	5
Cheetah	14	45875	0.00362408	0	Libya	TRUE		0	5
Cheetah	15	42700	0.00176673	0	Algeria	TRUE		0	5
Cheetah	16	39475	0.00169257	0.00443319	Egypt	FALSE		0	5
Cheetah	17	37050	0.00241909	0	Libya	TRUE		0	5
Cheetah	18	31025	0.00148472	0	Mauritania	FALSE		0	5
Cheetah	19	30975	0.00158598	0	Algeria	FALSE		0	5
Cheetah	20	30775	0.00275191	0	Mali	FALSE		0	5
Cheetah	21	29975	0.00298172	0	Chad	FALSE		0	5
Cheetah	22	29275	0.00168232	0	Mali	FALSE		0	5
Cheetah	23	23675	0.00164734	0	Sudan	FALSE		0	5
Cheetah	24	19625	0.00239179	0	Niger	FALSE		0	5
Cheetah	25	19400	0.00334094	0	Egypt	FALSE		0	5
Clouded leopard	1	16700	3.36139	0.0179641	Cambodia	FALSE		0	0
Clouded leopard	2	15900	4.26118	0	Lao People's Democratic Republic	FALSE		0	0
Clouded leopard	3	14400	4.76148	0.213542	Lao People's Democratic Republic	FALSE		0	0
Clouded leopard	4	13850	3.09548	0.00722022	Cambodia	FALSE		0	0
Clouded leopard	5	13700	3.79564	0.0273723	Cambodia	FALSE		0	0
Clouded leopard	6	11500	4.16983	0.076087	Myanmar	FALSE		0	0
Clouded leopard	7	9675	3.46806	0.0232558	Cambodia	FALSE		0	0
Clouded leopard	8	9325	4.10339	0	Lao People's Democratic Republic	FALSE		0	0
Clouded leopard	9	8550	4.34016	0	Lao People's Democratic Republic	FALSE		0	0
Clouded leopard	10	7325	3.79918	0.150171	Viet Nam	FALSE		0	0
Clouded leopard	11	6575	4.13744	0.380228	Thailand	FALSE		0	0
Clouded leopard	12	5875	4.2011	0.00851064	Myanmar	FALSE		0	0
Clouded leopard	13	4375	4.25547	0.114286	Myanmar	FALSE		0	0
Clouded leopard	14	4300	4.31874	0.447674	Thailand	FALSE		0	0
Clouded leopard	15	4100	4.83452	0	Lao People's Democratic Republic	FALSE		0	0
Clouded leopard	16	3875	4.7664	0.277419	Thailand	FALSE		0	0
Clouded leopard	17	3175	4.86058	0.748031	Thailand	FALSE		0	0
Clouded leopard	18	3075	4.46925	0	Myanmar	FALSE		0	0
Clouded leopard	19	3075	4.08599	0.146341	Viet Nam	FALSE		0	0
Clouded leopard	20	2825	4.29204	0	Myanmar	FALSE		0	0
Clouded leopard	21	2625	4.56947	0.72381	Thailand	FALSE		0	0
Clouded leopard	22	2600	5.22291	0.509615	Thailand	FALSE		0	0
Clouded leopard	23	2600	4.59228	0.461538	Thailand	FALSE		0	0
Clouded leopard	24	2350	2.13446	0	Cambodia	FALSE		0	0
Clouded leopard	25	2225	2.65668	0.41573	Viet Nam	FALSE		0	0
Dhole	1	429450	0.0031724	0	China	FALSE		0	15
Dhole	2	172900	0.0039179	0.00274725	Russian Federation	FALSE		0	15
Dhole	3	161600	0.00587933	0	Russian Federation	FALSE		0	15
Dhole	4	84450	0.00409133	0	China	FALSE		0	15
Dhole	5	78600	0.0062371	0	China	FALSE		0	15
Dhole	6	77675	0.0108251	0.0363695	Russian Federation	FALSE		0	15
Dhole	7	61650	0.0148154	0.614355	Mongolia	FALSE		0	15
Dhole	8	51550	0.0151562	0	China	FALSE		0	15
Dhole	9	42575	0.0122781	0.0023488	Russian Federation	FALSE	Sus scrofa	1	15
Dhole	10	24975	0.0114608	0.001001	Russian Federation	FALSE	Sus scrofa	1	15
Dhole	11	19400	0.0104534	0	Russian Federation	FALSE		0	15
Dhole	12	18450	0.0145774	0	Russian Federation	FALSE	Sus scrofa	1	15
Dhole	13	17875	0.0209942	0	China	FALSE		0	15
Dhole	14	17000	0.00968889	0	Russian Federation	FALSE		0	15
Dhole	15	16325	0.0178122	0	Russian Federation	FALSE		0	15
Dhole	16	14850	0.0189938	0	Russian Federation	TRUE		0	15
Dhole	17	13000	0.0155117	0.225	Russian Federation	FALSE		0	15
Dhole	18	11975	0.0185917	0	China	FALSE		0	15
Dhole	19	11825	0.0140095	0	Russian Federation	FALSE		0	15
Dhole	20	11375	0.0191907	0	Russian Federation	FALSE		0	15
Dhole	21	10975	0.0134023	0	Russian Federation	FALSE		0	15
Dhole	22	9050	0.0185648	0	China	FALSE		0	15
Dhole	23	8800	0.00822896	0	Russian Federation	FALSE		0	15
Dhole	24	8500	0.0215034	0	Russian Federation	TRUE	Sus scrofa	1	15
Dhole	25	7325	0.0188665	0	China	FALSE		0	15
Dingo	1	10450	0.455361	0.272727	Australia	TRUE	Oryctolagus cuniculus	1	6
Dingo	2	4550	0.756401	0.967033	Australia	TRUE	Macropus rufus,Oryctolagus cuniculus	2	6
Dingo	3	3975	1.49805	0	Australia	TRUE	Macropus robustus,Macropus rufus,Oryctolagus cuniculus	3	6
Dingo	4	2725	1.65586	0.366972	Australia	TRUE	Macropus robustus,Macropus rufus,Oryctolagus cuniculus	3	6
Dingo	5	2300	0.888857	0	Australia	TRUE	Oryctolagus cuniculus	1	6
Dingo	6	1850	1.35532	0	Australia	TRUE	Macropus robustus,Macropus rufus,Oryctolagus cuniculus	3	6
Dingo	7	1800	1.56204	0	Australia	TRUE	Macropus robustus,Oryctolagus cuniculus	2	6
Dingo	8	1700	1.28734	0.0147059	Australia	TRUE	Macropus robustus,Macropus rufus,Oryctolagus cuniculus	3	6
Dingo	9	1675	1.76904	0	Australia	TRUE	Macropus robustus,Macropus rufus,Oryctolagus cuniculus	3	6
Dingo	10	1550	1.12845	0	Australia	TRUE	Macropus robustus,Oryctolagus cuniculus	2	6
Dingo	11	1475	1.63452	0.389831	Australia	TRUE	Oryctolagus cuniculus	1	6
Dingo	12	1300	0.996323	0.903846	Australia	TRUE	Macropus robustus,Oryctolagus cuniculus	2	6
Dingo	13	1275	2.02985	0.0588235	Australia	TRUE	Macropus robustus,Wallabia bicolor,Macropus rufogriseus,Oryctolagus cuniculus	4	6
Dingo	14	1175	1.43282	0.106383	Australia	TRUE	Oryctolagus cuniculus	1	6
Dingo	15	1125	1.60735	0	Australia	TRUE	Macropus robustus,Macropus rufus,Oryctolagus cuniculus	3	6
Dingo	16	975	2.28833	0	Australia	TRUE	Macropus robustus,Macropus rufus,Oryctolagus cuniculus	3	6
Dingo	17	850	1.42105	0	Australia	TRUE	Macropus robustus,Macropus rufus,Oryctolagus cuniculus	3	6
Dingo	18	800	0.543504	0	Australia	TRUE	Oryctolagus cuniculus	1	6
Dingo	19	750	1.41548	0.1	Australia	TRUE	Macropus robustus,Wallabia bicolor,Macropus rufogriseus,Oryctolagus cuniculus	4	6
Dingo	20	725	2.15542	0.62069	Australia	TRUE	Macropus robustus,Oryctolagus cuniculus	2	6
Dingo	21	725	1.8121	0	Australia	TRUE	Macropus robustus,Macropus rufus,Wallabia bicolor,Oryctolagus cuniculus	4	6
Dingo	22	725	0.788774	0.896552	Australia	TRUE	Oryctolagus cuniculus	1	6
Dingo	23	675	2.21469	0	Australia	TRUE	Macropus robustus,Macropus rufus,Oryctolagus cuniculus	3	6
Dingo	24	675	0.868556	0.592593	Australia	TRUE	Macropus robustus,Macropus rufus,Oryctolagus cuniculus	3	6
Dingo	25	625	1.2413	0	Australia	TRUE	Macropus robustus,Macropus rufus,Oryctolagus cuniculus	3	6
Ethiopian wolf	1	11150	2.39191	0.0336323	Ethiopia	FALSE		0	4
Ethiopian wolf	2	8850	3.19078	0	Ethiopia	FALSE		0	4
Ethiopian wolf	3	7675	2.74034	0.364821	Ethiopia	FALSE		0	4
Ethiopian wolf	4	5575	2.59653	0	Ethiopia	FALSE		0	4
Ethiopian wolf	5	5400	2.62361	0	Ethiopia	FALSE		0	4
Ethiopian wolf	6	4075	3.11578	0	Ethiopia	FALSE		0	4
Ethiopian wolf	7	4000	2.62082	0	Ethiopia	FALSE		0	4
Ethiopian wolf	8	2500	2.83699	0.03	Ethiopia	FALSE		0	4
Ethiopian wolf	9	2425	3.02665	0	Ethiopia	FALSE		0	4
Ethiopian wolf	10	2100	3.24158	0	Ethiopia	FALSE		0	4
Ethiopian wolf	11	1925	0.54524	0	Ethiopia	FALSE	Otomys typus	1	4
Ethiopian wolf	12	1900	2.96267	0	Ethiopia	FALSE		0	4
Ethiopian wolf	13	1825	2.46728	0.0410959	Ethiopia	FALSE		0	4
Ethiopian wolf	14	1775	2.46317	0	Ethiopia	FALSE		0	4
Ethiopian wolf	15	1525	2.92938	0	Ethiopia	FALSE		0	4
Ethiopian wolf	16	1150	3.30943	0	Ethiopia	FALSE		0	4
Ethiopian wolf	17	1025	3.33854	0	Ethiopia	FALSE		0	4
Ethiopian wolf	18	1000	3.44494	0	Ethiopia	FALSE		0	4
Ethiopian wolf	19	900	3.23173	0	Ethiopia	FALSE		0	4
Ethiopian wolf	20	775	3.4137	0	Ethiopia	FALSE		0	4
Ethiopian wolf	21	675	3.45631	0	Ethiopia	FALSE		0	4
Ethiopian wolf	22	650	3.43017	0	Ethiopia	FALSE		0	4
Ethiopian wolf	23	625	2.8919	0	Ethiopia	FALSE		0	4
Ethiopian wolf	24	625	2.92584	0	Ethiopia	FALSE		0	4
Ethiopian wolf	25	600	2.15631	0.166667	Ethiopia	FALSE		0	4
Eurasian lynx	1	8325	3.01604	0.354354	Norway	FALSE	Capreolus capreolus,Cervus elaphus	2	5
Eurasian lynx	2	7425	5.7103	0	Greece	FALSE		0	5
Eurasian lynx	3	5550	5.4673	0	France	FALSE	Capreolus capreolus,Cervus elaphus	2	5
Eurasian lynx	4	5550	5.11392	0	France	FALSE	Capreolus capreolus,Cervus elaphus	2	5
Eurasian lynx	5	5100	1.24796	0	Russian Federation	TRUE		0	5
Eurasian lynx	6	4375	2.86364	0.582857	Norway	FALSE	Capreolus capreolus,Rangifer tarandus,Cervus elaphus	3	5
Eurasian lynx	7	4325	5.09504	0	Greece	FALSE	Cervus elaphus	1	5
Eurasian lynx	8	3425	5.36197	0	France	FALSE	Capreolus capreolus,Cervus elaphus	2	5
Eurasian lynx	9	2600	4.21271	0	Romania	FALSE		0	5
Eurasian lynx	10	2550	4.18837	0	Sweden	FALSE	Capreolus capreolus,Cervus elaphus	2	5
Eurasian lynx	11	2550	5.58651	0	France	FALSE	Capreolus capreolus,Cervus elaphus	2	5
Eurasian lynx	12	2275	5.23865	0	Italy	FALSE	Capreolus capreolus	1	5
Eurasian lynx	13	2200	4.82017	0	France	FALSE	Capreolus capreolus,Cervus elaphus	2	5
Eurasian lynx	14	2175	5.16334	0.0344828	France	FALSE	Capreolus capreolus,Cervus elaphus	2	5
Eurasian lynx	15	2000	5.3524	0	France	FALSE	Capreolus capreolus	1	5
Eurasian lynx	16	1925	5.10283	0	France	FALSE	Capreolus capreolus,Cervus elaphus	2	5
Eurasian lynx	17	1875	6.20746	0	Bulgaria	FALSE	Capreolus capreolus	1	5
Eurasian lynx	18	1750	5.90169	0.257143	Italy	FALSE	Capreolus capreolus,Rupicapra rupicapra	2	5
Eurasian lynx	19	1750	5.80211	0	Turkey	FALSE	Cervus elaphus	1	5
Eurasian lynx	20	1700	5.15313	0.0147059	The former Yugoslav Republic of Macedonia	FALSE		0	5
Eurasian lynx	21	1650	5.12409	0	Croatia	FALSE	Capreolus capreolus,Cervus elaphus	2	5
Eurasian lynx	22	1625	6.1305	0	Turkey	FALSE		0	5
Eurasian lynx	23	1550	5.34055	0	France	FALSE	Capreolus capreolus,Cervus elaphus	2	5
Eurasian lynx	24	1525	5.96049	0	Croatia	FALSE	Capreolus capreolus,Cervus elaphus	2	5
Eurasian lynx	25	1400	4.99667	0	France	FALSE	Capreolus capreolus,Cervus elaphus	2	5
Gray wolf	1	82075	0.823895	0.113006	Finland	FALSE	Alces alces,Lepus timidus	2	51
Gray wolf	2	59825	0.845054	0.211868	Sweden	FALSE	Alces alces,Lepus timidus	2	51
Gray wolf	3	51725	1.11241	0	United States of America	FALSE	Odocoileus hemionus	1	51
Gray wolf	4	35825	0.969105	0	United States of America	FALSE	Odocoileus hemionus	1	51
Gray wolf	5	29475	0.735627	0	United States of America	FALSE	Alces alces,Odocoileus virginianus,Castor canadensis,Lepus americanus	4	51
Gray wolf	6	27200	1.48945	0.00551471	United States of America	FALSE	Odocoileus hemionus,Castor canadensis,Lepus californicus	3	51
Gray wolf	7	24100	0.472275	0.113071	Canada	TRUE		0	51
Gray wolf	8	16875	0.496478	0.0577778	Canada	FALSE	Alces alces,Odocoileus virginianus,Castor canadensis,Lepus americanus	4	51
Gray wolf	9	16100	0.915695	0.0357143	Canada	FALSE	Alces alces,Odocoileus virginianus,Castor canadensis,Lepus americanus	4	51
Gray wolf	10	14675	1.11825	0	United States of America	FALSE	Odocoileus hemionus,Castor canadensis,Lepus townsendii	3	51
Gray wolf	11	13125	1.42185	0	United States of America	FALSE	Odocoileus hemionus,Castor canadensis,Lepus californicus	3	51
Gray wolf	12	11750	1.58644	0	United States of America	FALSE	Odocoileus hemionus,Castor canadensis,Lepus californicus	3	51
Gray wolf	13	11350	0.825793	0	United States of America	FALSE	Odocoileus hemionus,Castor canadensis,Lepus californicus,Lepus townsendii	4	51
Gray wolf	14	10675	1.11893	0	United States of America	FALSE	Alces alces,Odocoileus hemionus,Odocoileus virginianus,Castor canadensis,Lepus townsendii	5	51
Gray wolf	15	10650	1.55773	0.0492958	Canada	FALSE	Odocoileus hemionus,Odocoileus virginianus,Castor canadensis,Lepus townsendii	4	51
Gray wolf	16	9900	1.44131	0	United States of America	FALSE	Odocoileus hemionus,Odocoileus virginianus,Castor canadensis,Lepus californicus	4	51
Gray wolf	17	9800	1.26415	0	Myanmar	FALSE	Muntiacus vaginalis,Rusa unicolor,Sus scrofa	3	51
Gray wolf	18	8925	0.707705	0.00840336	Canada	FALSE	Alces alces,Odocoileus virginianus,Castor canadensis,Lepus americanus	4	51
Gray wolf	19	8200	1.63791	0	United States of America	FALSE	Odocoileus hemionus,Lepus californicus	2	51
Gray wolf	20	7825	1.12791	0	United States of America	FALSE	Odocoileus hemionus,Odocoileus virginianus,Castor canadensis	3	51
Gray wolf	21	7625	2.14152	0	Mexico	FALSE	Odocoileus virginianus	1	51
Gray wolf	22	7575	1.72294	0	United States of America	FALSE	Odocoileus hemionus,Lepus californicus	2	51
Gray wolf	23	7375	1.41086	0	United States of America	FALSE	Odocoileus hemionus,Castor canadensis,Lepus americanus	3	51
Gray wolf	24	6750	0.866724	0.292593	Malaysia	FALSE	Rusa unicolor,Sus scrofa	2	51
Gray wolf	25	6625	2.17312	0	United States of America	FALSE	Odocoileus hemionus,Castor canadensis,Lepus californicus,Lepus townsendii	4	51
Jaguar	1	474325	0.236742	0.126654	Brazil	TRUE	Pecari tajacu,Tayassu pecari,Hydrochoerus hydrochaeris,Cuniculus paca,Cabassous unicinctus,Dasypus novemcinctus,Priodontes maximus	7	22
Jaguar	2	161900	0.445333	0.154725	Brazil	TRUE	Pecari tajacu,Tayassu pecari,Hydrochoerus hydrochaeris,Cuniculus paca,Cabassous unicinctus,Dasypus kappleri,Dasypus novemcinctus,Priodontes maximus	8	22
Jaguar	3	100400	0.0343158	0.0542829	Brazil	TRUE	Pecari tajacu,Tayassu pecari,Hydrochoerus hydrochaeris,Cuniculus paca,Cabassous unicinctus,Dasypus kappleri,Dasypus novemcinctus,Priodontes maximus	8	22
Jaguar	4	41225	0.0827066	0.00121286	Brazil	TRUE	Pecari tajacu,Tayassu pecari,Hydrochoerus hydrochaeris,Cuniculus paca,Cabassous unicinctus,Dasypus kappleri,Dasypus novemcinctus,Priodontes maximus	8	22
Jaguar	5	39525	0.0745324	0.402277	Brazil	TRUE	Pecari tajacu,Tayassu pecari,Hydrochoerus hydrochaeris,Cuniculus paca,Cabassous unicinctus,Dasypus kappleri,Dasypus novemcinctus,Priodontes maximus	8	22
Jaguar	6	21150	0.86959	0.20922	Brazil	TRUE	Pecari tajacu,Tayassu pecari,Hydrochoerus hydrochaeris,Cuniculus paca,Cabassous unicinctus,Dasypus kappleri,Dasypus novemcinctus,Priodontes maximus	8	22
Jaguar	7	19250	0.00618761	0.0012987	Brazil	TRUE	Pecari tajacu,Tayassu pecari,Hydrochoerus hydrochaeris,Cuniculus paca,Cabassous unicinctus,Dasypus kappleri,Dasypus novemcinctus,Priodontes maximus	8	22
Jaguar	8	11300	0.787128	0	Brazil	TRUE	Pecari tajacu,Tayassu pecari,Hydrochoerus hydrochaeris,Cuniculus paca,Cabassous unicinctus,Dasypus kappleri,Dasypus novemcinctus,Dasypus septemcinctus,Priodontes maximus	9	22
Jaguar	9	10550	0.156544	0.464455	Brazil	TRUE	Pecari tajacu,Tayassu pecari,Hydrochoerus hydrochaeris,Cuniculus paca,Cabassous unicinctus,Dasypus kappleri,Dasypus novemcinctus,Priodontes maximus	8	22
Jaguar	10	9825	0.467157	0.442748	Brazil	TRUE	Pecari tajacu,Tayassu pecari,Hydrochoerus hydrochaeris,Cuniculus paca,Cabassous unicinctus,Dasypus kappleri,Dasypus novemcinctus,Euphractus sexcinctus,Priodontes maximus	9	22
Jaguar	11	8125	0.571633	0	Venezuela, Bolivarian Republic of	TRUE	Pecari tajacu,Hydrochoerus hydrochaeris,Cuniculus paca,Cabassous unicinctus,Dasypus kappleri,Dasypus novemcinctus,Priodontes maximus	7	22
Jaguar	12	6400	0.231225	0	United States of America	FALSE		0	22
Jaguar	13	6125	0.316704	0.665306	Brazil	TRUE	Pecari tajacu,Tayassu pecari,Hydrochoerus hydrochaeris,Cuniculus paca,Cabassous unicinctus,Dasypus kappleri,Dasypus novemcinctus,Priodontes maximus	8	22
Jaguar	14	5900	0.0843317	0.139831	Venezuela, Bolivarian Republic of	TRUE	Pecari tajacu,Hydrochoerus hydrochaeris,Cuniculus paca,Cabassous unicinctus,Dasypus kappleri,Dasypus novemcinctus,Priodontes maximus	7	22
Jaguar	15	5850	0.0522114	0.0042735	Venezuela, Bolivarian Republic of	TRUE	Pecari tajacu,Hydrochoerus hydrochaeris,Cuniculus paca,Cabassous unicinctus,Dasypus kappleri,Dasypus novemcinctus,Priodontes maximus	7	22
Jaguar	16	4950	0.0355439	0.621212	Brazil	TRUE	Pecari tajacu,Tayassu pecari,Hydrochoerus hydrochaeris,Cuniculus paca,Cabassous unicinctus,Dasypus kappleri,Dasypus novemcinctus,Priodontes maximus	8	22
Jaguar	17	4525	1	0	Brazil	TRUE	Pecari tajacu,Tayassu pecari,Hydrochoerus hydrochaeris,Cuniculus paca,Cabassous unicinctus,Dasypus novemcinctus,Priodontes maximus	7	22
Jaguar	18	4350	0.262532	0	Brazil	TRUE	Pecari tajacu,Tayassu pecari,Hydrochoerus hydrochaeris,Cuniculus paca,Cabassous unicinctus,Dasypus kappleri,Dasypus novemcinctus,Priodontes maximus	8	22
Jaguar	19	4075	0.047386	0	Brazil	TRUE	Pecari tajacu,Tayassu pecari,Hydrochoerus hydrochaeris,Cuniculus paca,Cabassous unicinctus,Dasypus kappleri,Dasypus novemcinctus,Priodontes maximus	8	22
Jaguar	20	3950	0.390665	0	United States of America	FALSE		0	22
Jaguar	21	3825	0.143366	0	Brazil	TRUE	Pecari tajacu,Tayassu pecari,Hydrochoerus hydrochaeris,Cuniculus paca,Cabassous unicinctus,Dasypus kappleri,Dasypus novemcinctus,Priodontes maximus	8	22
Jaguar	22	3400	0.0185294	0.0955882	Venezuela, Bolivarian Republic of	TRUE	Pecari tajacu,Tayassu pecari,Hydrochoerus hydrochaeris,Cuniculus paca,Cabassous unicinctus,Dasypus kappleri,Dasypus novemcinctus,Priodontes maximus	8	22
Jaguar	23	3175	1	0.015748	Argentina	TRUE		0	22
Jaguar	24	3050	0.235946	0.672131	Brazil	TRUE	Pecari tajacu,Tayassu pecari,Hydrochoerus hydrochaeris,Cuniculus paca,Cabassous unicinctus,Dasypus kappleri,Dasypus novemcinctus,Priodontes maximus	8	22
Jaguar	25	3000	0.0681627	0	Brazil	TRUE	Pecari tajacu,Tayassu pecari,Hydrochoerus hydrochaeris,Cuniculus paca,Cabassous unicinctus,Dasypus kappleri,Dasypus novemcinctus,Priodontes maximus	8	22
Leopard	1	1222925	0.274543	0.00523335	Mauritania	FALSE		0	3
Leopard	2	477500	0.203318	0	Niger	FALSE		0	3
Leopard	3	122900	0.231305	0	Oman	FALSE		0	3
Leopard	4	107675	0.334253	0	Algeria	FALSE		0	3
Leopard	5	103225	0.725013	0	Algeria	FALSE		0	3
Leopard	6	93375	0.85489	0	Sudan	FALSE		0	3
Leopard	7	33925	0.153592	0	Sudan	FALSE		0	3
Leopard	8	24650	1.06263	0	Saudi Arabia	FALSE		0	3
Leopard	9	21600	0.273538	0	Egypt	FALSE		0	3
Leopard	10	21525	0.35353	0	Yemen	FALSE		0	3
Leopard	11	21000	0.233334	0	Egypt	FALSE		0	3
Leopard	12	17875	0.406672	0	Algeria	FALSE		0	3
Leopard	13	16425	0.665284	0.482496	Western Sahara	FALSE		0	3
Leopard	14	15750	0.997832	0	Iran (Islamic Republic of)	FALSE		0	3
Leopard	15	15500	0.691682	0	Mali	FALSE		0	3
Leopard	16	13875	1.13074	0	Morocco	FALSE		0	3
Leopard	17	13800	0.272456	0	Egypt	FALSE		0	3
Leopard	18	13550	1.164	0	Western Sahara	FALSE		0	3
Leopard	19	13275	1.12894	0	Western Sahara	FALSE		0	3
Leopard	20	11150	1.1687	0	Western Sahara	FALSE		0	3
Leopard	21	10650	1.11032	0	Sudan	FALSE		0	3
Leopard	22	9925	0.747268	0.0403023	Botswana	FALSE	Sylvicapra grimmia,Aepyceros melampus	2	3
Leopard	23	9675	0.908039	0	Algeria	FALSE		0	3
Leopard	24	9575	1.09341	0	Iran (Islamic Republic of)	FALSE		0	3
Leopard	25	9550	0.257688	0	Egypt	FALSE		0	3
Lion	1	375950	0.295115	0.00332491	Mauritania	FALSE		0	7
Lion	2	293300	0.205424	0	Mali	FALSE		0	7
Lion	3	168200	0.130796	0	Mauritania	FALSE		0	7
Lion	4	159775	0.2701	0	Niger	FALSE		0	7
Lion	5	94750	0.649433	0	Algeria	FALSE		0	7
Lion	6	74300	0.193183	0	Algeria	FALSE		0	7
Lion	7	62175	0.967042	0	Sudan	FALSE		0	7
Lion	8	44875	0.181082	0	Mauritania	FALSE		0	7
Lion	9	30450	0.643068	0	Western Sahara	FALSE		0	7
Lion	10	29400	0.329944	0	Chad	FALSE		0	7
Lion	11	27750	0.396144	0	Botswana	FALSE	Oryx gazella,Connochaetes taurinus	2	7
Lion	12	27150	0.319601	0	Niger	FALSE		0	7
Lion	13	25450	0.116363	0	Algeria	TRUE		0	7
Lion	14	25100	1.01298	0	Congo	TRUE	Syncerus caffer	1	7
Lion	15	23300	0.106098	0	Egypt	FALSE		0	7
Lion	16	17550	0.0915533	0	Mali	FALSE		0	7
Lion	17	16475	0.319366	0	Algeria	FALSE		0	7
Lion	18	15875	0.206806	0.903937	Namibia	FALSE		0	7
Lion	19	13975	0.437956	0.36136	Western Sahara	FALSE		0	7
Lion	20	13925	0.50845	0	Mauritania	FALSE		0	7
Lion	21	13625	0.203071	0	Mauritania	FALSE		0	7
Lion	22	13400	0.577631	0	Mali	FALSE		0	7
Lion	23	13375	0.517701	0.573832	Western Sahara	FALSE		0	7
Lion	24	11750	0.516645	0.0191489	Botswana	FALSE	Oryx gazella,Connochaetes taurinus	2	7
Lion	25	11175	0.990746	0	Algeria	FALSE		0	7
Puma	1	132050	0.00673496	0.169443	Canada	FALSE	Erethizon dorsatum	1	3
Puma	2	108775	0.00887849	0.204091	Canada	TRUE	Odocoileus hemionus,Erethizon dorsatum	2	3
Puma	3	92075	0.0166885	0.120825	Canada	FALSE	Erethizon dorsatum	1	3
Puma	4	65950	0.00854925	0.148218	Canada	TRUE	Odocoileus virginianus,Erethizon dorsatum	2	3
Puma	5	51975	0.0136675	0.142376	Canada	TRUE	Odocoileus hemionus,Erethizon dorsatum	2	3
Puma	6	33575	0.0140784	0	Peru	TRUE		0	3
Puma	7	31075	0.00976096	0.813355	Peru	TRUE		0	3
Puma	8	23275	0.0213495	0.019334	Canada	FALSE	Odocoileus hemionus,Odocoileus virginianus,Erethizon dorsatum	3	3
Puma	9	20525	0.0166468	0.0621194	Canada	TRUE	Odocoileus virginianus,Erethizon dorsatum	2	3
Puma	10	16950	0.021982	0.0457227	Canada	TRUE	Odocoileus hemionus,Odocoileus virginianus,Erethizon dorsatum	3	3
Puma	11	16900	0.0110528	0	Peru	TRUE		0	3
Puma	12	14175	0.0116438	0	Peru	TRUE		0	3
Puma	13	12100	0.0377799	0.130165	Canada	TRUE	Odocoileus virginianus,Erethizon dorsatum	2	3
Puma	14	11800	0.0432217	0.158898	Canada	FALSE	Odocoileus virginianus,Erethizon dorsatum	2	3
Puma	15	10425	0.0472824	0	Bolivia (Plurinational State of)	TRUE		0	3
Puma	16	9550	0.0177332	0.0863874	Canada	TRUE	Odocoileus virginianus,Erethizon dorsatum	2	3
Puma	17	9150	0.0390077	0.0519126	Canada	TRUE	Odocoileus virginianus,Erethizon dorsatum	2	3
Puma	18	8600	0.0465918	0.386628	Canada	TRUE	Odocoileus virginianus,Erethizon dorsatum	2	3
Puma	19	8100	0.0246892	0	Canada	TRUE	Odocoileus hemionus,Odocoileus virginianus,Erethizon dorsatum	3	3
Puma	20	7650	0.0456143	0	United States of America	FALSE	Odocoileus virginianus,Erethizon dorsatum	2	3
Puma	21	7425	0.0235965	0	Canada	TRUE	Odocoileus virginianus,Erethizon dorsatum	2	3
Puma	22	7150	0.0395852	0.0104895	Canada	TRUE	Odocoileus virginianus,Erethizon dorsatum	2	3
Puma	23	7000	0.0241266	0.0892857	Canada	TRUE	Odocoileus virginianus,Erethizon dorsatum	2	3
Puma	24	6925	0.0439409	0.212996	Canada	TRUE	Odocoileus virginianus,Erethizon dorsatum	2	3
Puma	25	6500	0.047502	0.126923	Canada	TRUE	Odocoileus virginianus,Erethizon dorsatum	2	3
Red wolf	1	9350	1.48884	0.248663	United States of America	FALSE	Odocoileus virginianus,Sylvilagus floridanus	2	3
Red wolf	2	4550	2.21905	0	United States of America	FALSE	Odocoileus virginianus,Sylvilagus floridanus,Sylvilagus palustris	3	3
Red wolf	3	4450	1.89068	0	United States of America	FALSE	Odocoileus virginianus,Sylvilagus floridanus	2	3
Red wolf	4	3000	2.46483	0	United States of America	FALSE	Odocoileus virginianus,Sylvilagus floridanus	2	3
Red wolf	5	2925	2.59139	0	United States of America	FALSE	Odocoileus virginianus,Sylvilagus floridanus	2	3
Red wolf	6	2825	2.06584	0	United States of America	FALSE	Odocoileus virginianus,Sylvilagus floridanus	2	3
Red wolf	7	2450	2.58177	0	United States of America	FALSE	Odocoileus virginianus,Sylvilagus floridanus	2	3
Red wolf	8	2250	2.0808	0	United States of America	FALSE	Odocoileus virginianus,Sylvilagus floridanus	2	3
Red wolf	9	2225	3.13806	0	United States of America	FALSE	Odocoileus virginianus,Sylvilagus floridanus	2	3
Red wolf	10	2225	3.17463	0	United States of America	FALSE	Odocoileus virginianus,Sylvilagus floridanus	2	3
Red wolf	11	2200	2.61486	0	United States of America	FALSE	Odocoileus virginianus,Sylvilagus floridanus	2	3
Red wolf	12	2000	2.52352	0	United States of America	FALSE	Odocoileus virginianus,Sylvilagus floridanus	2	3
Red wolf	13	1850	2.80284	0	United States of America	FALSE	Odocoileus virginianus,Sylvilagus floridanus	2	3
Red wolf	14	1625	2.85616	0	United States of America	FALSE	Odocoileus virginianus,Sylvilagus floridanus	2	3
Red wolf	15	1475	3.20567	0	United States of America	FALSE	Odocoileus virginianus,Sylvilagus floridanus	2	3
Red wolf	16	1425	2.60532	0	United States of America	FALSE	Odocoileus virginianus,Sylvilagus floridanus	2	3
Red wolf	17	1275	1.19506	0	United States of America	FALSE	Odocoileus virginianus,Sylvilagus floridanus,Sylvilagus palustris	3	3
Red wolf	18	1175	3.12377	0	United States of America	FALSE	Odocoileus virginianus,Sylvilagus floridanus	2	3
Red wolf	19	1125	2.76599	0	United States of America	FALSE	Odocoileus virginianus,Sylvilagus floridanus	2	3
Red wolf	20	1125	3.32503	0	United States of America	FALSE	Odocoileus virginianus,Sylvilagus floridanus	2	3
Red wolf	21	1075	3.14818	0	United States of America	FALSE	Odocoileus virginianus,Sylvilagus floridanus	2	3
Red wolf	22	1050	3.33197	0	United States of America	FALSE	Odocoileus virginianus,Sylvilagus floridanus	2	3
Red wolf	23	1025	3.31756	0	United States of America	FALSE	Odocoileus virginianus,Sylvilagus floridanus	2	3
Red wolf	24	1000	2.31958	0	United States of America	FALSE	Odocoileus virginianus,Sylvilagus floridanus,Sylvilagus palustris	3	3
Red wolf	25	925	2.99814	0	United States of America	FALSE	Odocoileus virginianus,Sylvilagus floridanus	2	3
Sloth bear	1	37650	5.45103	0	Myanmar	FALSE		0	0
Sloth bear	2	27525	6.07281	0.0118074	India	FALSE		0	0
Sloth bear	3	5025	7.1401	0	Myanmar	FALSE		0	0
Sloth bear	4	4700	8.0734	0.0478723	Bangladesh	FALSE		0	0
Sloth bear	5	1525	7.91555	0.508197	Bhutan	FALSE		0	0
Sloth bear	6	1200	8.22338	0.0625	Sri Lanka	FALSE		0	0
Sloth bear	7	1100	8.29633	0.272727	Sri Lanka	FALSE		0	0
Sloth bear	8	825	6.28657	0	Bhutan	FALSE		0	0
Sloth bear	9	775	8.95583	0.0322581	Bhutan	FALSE		0	0
Sloth bear	10	650	8.03315	0	Sri Lanka	FALSE		0	0
Sloth bear	11	575	7.63417	0	Sri Lanka	FALSE		0	0
Sloth bear	12	525	8.27061	0	India	FALSE		0	0
Sloth bear	13	475	8.32425	0	Nepal	FALSE		0	0
Sloth bear	14	475	7.64597	0.105263	Sri Lanka	FALSE		0	0
Sloth bear	15	450	8.28963	0	Nepal	FALSE		0	0
Sloth bear	16	450	8.72692	0	Bhutan	FALSE		0	0
Sloth bear	17	400	9.0372	0	Nepal	FALSE		0	0
Sloth bear	18	325	8.35394	0	Sri Lanka	FALSE		0	0
Sloth bear	19	300	8.21811	0	Sri Lanka	FALSE		0	0
Sloth bear	20	225	8.18844	0	India	FALSE		0	0
Sloth bear	21	225	7.91407	0.222222	India	FALSE		0	0
Sloth bear	22	225	8.21324	0	India	FALSE		0	0
Sloth bear	23	200	9.42833	0	Nepal	FALSE		0	0
Sloth bear	24	200	8.41706	0	India	FALSE		0	0
Sloth bear	25	200	8.44663	0.25	Sri Lanka	FALSE		0	0
Snow leopard	1	443550	0	0	China	FALSE		0	2
Snow leopard	2	20225	0	0.112485	Russian Federation	FALSE		0	2
Snow leopard	3	12225	0	0	China	FALSE	Pseudois nayaur	1	2
Snow leopard	4	9450	0	0.00529101	Russian Federation	FALSE		0	2
Snow leopard	5	9250	0	0	China	FALSE		0	2
Snow leopard	6	6875	0	0	Russian Federation	FALSE		0	2
Snow leopard	7	6650	0	0	China	FALSE	Pseudois nayaur	1	2
Snow leopard	8	6425	0	0	China	FALSE	Pseudois nayaur	1	2
Snow leopard	9	5850	0	1	Mongolia	FALSE		0	2
Snow leopard	10	5650	0	0.707965	Mongolia	FALSE		0	2
Snow leopard	11	5550	0	0.882883	Mongolia	FALSE		0	2
Snow leopard	12	4525	0	0	Mongolia	FALSE		0	2
Snow leopard	13	4500	0	0	China	FALSE		0	2
Snow leopard	14	4225	0	0	China	FALSE	Pseudois nayaur	1	2
Snow leopard	15	3700	0	0	Russian Federation	FALSE		0	2
Snow leopard	16	3450	0	0	China	FALSE	Pseudois nayaur	1	2
Snow leopard	17	3225	0	0	China	FALSE	Pseudois nayaur	1	2
Snow leopard	18	3175	0	0	China	FALSE	Pseudois nayaur	1	2
Snow leopard	19	2775	0	0	China	FALSE	Pseudois nayaur	1	2
Snow leopard	20	2700	0	0	China	FALSE	Pseudois nayaur	1	2
Snow leopard	21	2600	0	0	China	TRUE	Pseudois nayaur	1	2
Snow leopard	22	2325	0	0	China	FALSE	Pseudois nayaur	1	2
Snow leopard	23	2275	0	0	Mongolia	FALSE		0	2
Snow leopard	24	2100	0	0	Mongolia	FALSE		0	2
Snow leopard	25	1675	0	0	China	FALSE	Pseudois nayaur	1	2
Spotted hyena	1	215050	0	0	Niger	FALSE		0	1
Spotted hyena	2	29875	0	0	Mauritania	FALSE		0	1
Spotted hyena	3	27975	0	0	Mauritania	FALSE		0	1
Spotted hyena	4	23100	0	0	Mauritania	FALSE		0	1
Spotted hyena	5	21400	0	0	Chad	FALSE		0	1
Spotted hyena	6	21375	0	0	Mali	FALSE		0	1
Spotted hyena	7	18725	0	0	Niger	FALSE		0	1
Spotted hyena	8	14125	0	0	Mali	FALSE		0	1
Spotted hyena	9	13900	0	0	Chad	FALSE		0	1
Spotted hyena	10	11850	0	0	Mauritania	FALSE		0	1
Spotted hyena	11	9250	0	0	Niger	FALSE		0	1
Spotted hyena	12	8750	0	0.931429	Namibia	FALSE	Oryx gazella	1	1
Spotted hyena	13	6825	0	0	Chad	FALSE		0	1
Spotted hyena	14	4725	0	0	Namibia	FALSE	Oryx gazella	1	1
Spotted hyena	15	3725	0	0	Chad	FALSE		0	1
Spotted hyena	16	3100	0	0.959677	Namibia	FALSE		0	1
Spotted hyena	17	3100	0	0.419355	Namibia	FALSE		0	1
Spotted hyena	18	3000	0	0	Mali	FALSE		0	1
Spotted hyena	19	2700	0	0	Mauritania	FALSE		0	1
Spotted hyena	20	2700	0	0	Namibia	FALSE	Oryx gazella	1	1
Spotted hyena	21	2625	0	0	Namibia	FALSE	Oryx gazella	1	1
Spotted hyena	22	2525	0	0	Namibia	FALSE	Oryx gazella	1	1
Spotted hyena	23	2475	0	0	Mali	FALSE		0	1
Spotted hyena	24	2425	0	0	Mali	FALSE		0	1
Spotted hyena	25	2050	0	0	Central African Republic	FALSE		0	1
Striped hyena	1	370700	1.59967	0.00816024	Saudi Arabia	FALSE		0	0
Striped hyena	2	107775	0.547067	0	Chad	FALSE		0	0
Striped hyena	3	13400	2	0	Saudi Arabia	FALSE		0	0
Striped hyena	4	13325	1.88813	0	Sudan	FALSE		0	0
Striped hyena	5	13175	1.19021	0	Sudan	FALSE		0	0
Striped hyena	6	13175	1.56211	0	Sudan	FALSE		0	0
Striped hyena	7	12900	0.513494	0.0968992	Central African Republic	FALSE		0	0
Striped hyena	8	12700	1.13069	0	Sudan	FALSE		0	0
Striped hyena	9	11700	1.13362	0	Sudan	FALSE		0	0
Striped hyena	10	8700	2	0	Sudan	FALSE		0	0
Striped hyena	11	6125	1.23767	0	Sudan	FALSE		0	0
Striped hyena	12	5900	1.16749	0	Sudan	FALSE		0	0
Striped hyena	13	5425	1.17606	0	Sudan	FALSE		0	0
Striped hyena	14	4900	1.29609	0	Sudan	FALSE		0	0
Striped hyena	15	4325	1.1685	0.815029	Central African Republic	FALSE		0	0
Striped hyena	16	4225	0.210569	0	Sudan	FALSE		0	0
Striped hyena	17	4225	1.19459	0	Sudan	FALSE		0	0
Striped hyena	18	4200	1.26049	0.125	Central African Republic	FALSE		0	0
Striped hyena	19	3875	1.26056	0	Sudan	FALSE		0	0
Striped hyena	20	3750	1.29583	0	Sudan	FALSE		0	0
Striped hyena	21	3600	1.25482	0.972222	Central African Republic	FALSE		0	0
Striped hyena	22	3550	2	0	Saudi Arabia	FALSE		0	0
Striped hyena	23	3450	1.27408	0	Sudan	FALSE		0	0
Striped hyena	24	3375	1.23617	0	Sudan	FALSE		0	0
Striped hyena	25	3300	1.22885	0	Sudan	FALSE		0	0
Sun bear	1	9100	3.58339	0.0137363	Myanmar	FALSE		0	0
Sun bear	2	7225	3.23493	0	Lao People's Democratic Republic	FALSE		0	0
Sun bear	3	4375	3.74057	0.217143	Thailand	FALSE		0	0
Sun bear	4	3100	3.75025	0.016129	Viet Nam	FALSE		0	0
Sun bear	5	2950	4.36637	0.152542	Lao People's Democratic Republic	FALSE		0	0
Sun bear	6	2850	3.93872	0.192982	Viet Nam	FALSE		0	0
Sun bear	7	2775	3.50975	0	India	FALSE		0	0
Sun bear	8	2700	4.40908	0.648148	Thailand	FALSE		0	0
Sun bear	9	2500	3.57293	0	Lao People's Democratic Republic	FALSE		0	0
Sun bear	10	2500	3.61724	0	Lao People's Democratic Republic	FALSE		0	0
Sun bear	11	2450	4.2073	0	Lao People's Democratic Republic	FALSE		0	0
Sun bear	12	2450	1.8001	0.0714286	Lao People's Democratic Republic	FALSE		0	0
Sun bear	13	2350	4.40585	0	Lao People's Democratic Republic	FALSE		0	0
Sun bear	14	2300	3.44838	0	Lao People's Democratic Republic	FALSE		0	0
Sun bear	15	2150	3.72036	0	Viet Nam	FALSE		0	0
Sun bear	16	2050	4.25476	0	Lao People's Democratic Republic	FALSE		0	0
Sun bear	17	2025	1.57882	0	Cambodia	FALSE		0	0
Sun bear	18	1750	3.98105	0	Lao People's Democratic Republic	FALSE		0	0
Sun bear	19	1725	3.85432	0	Viet Nam	FALSE		0	0
Sun bear	20	1600	4.42593	0.1875	Thailand	FALSE		0	0
Sun bear	21	1550	3.81196	0	India	FALSE		0	0
Sun bear	22	1425	3.86624	0.333333	Myanmar	FALSE		0	0
Sun bear	23	1400	2.99573	0	Lao People's Democratic Republic	FALSE		0	0
Sun bear	24	1325	4.37055	0	Lao People's Democratic Republic	FALSE		0	0
Sun bear	25	1325	4.1574	0.622642	Thailand	FALSE		0	0
Sunda clouded leopard	1	11250	2.7177	0.451111	Indonesia	FALSE		0	0
Sunda clouded leopard	2	4050	3.17773	0	Indonesia	TRUE		0	0
Sunda clouded leopard	3	3000	2.84972	0.216667	Indonesia	FALSE		0	0
Sunda clouded leopard	4	2250	3.10801	0	Indonesia	FALSE		0	0
Sunda clouded leopard	5	2225	3.59026	0.359551	Indonesia	FALSE		0	0
Sunda clouded leopard	6	1550	3.58126	0.258065	Indonesia	FALSE		0	0
Sunda clouded leopard	7	1475	3.36202	0.440678	Indonesia	FALSE		0	0
Sunda clouded leopard	8	1300	2.11029	0.0769231	Indonesia	FALSE		0	0
Sunda clouded leopard	9	1075	4.00466	0	Indonesia	FALSE		0	0
Sunda clouded leopard	10	1050	2.90854	0	Indonesia	FALSE		0	0
Sunda clouded leopard	11	925	3.39662	0	Indonesia	FALSE		0	0
Sunda clouded leopard	12	850	3.55072	0	Indonesia	FALSE		0	0
Sunda clouded leopard	13	800	3.21037	0	Indonesia	FALSE		0	0
Sunda clouded leopard	14	675	3.8518	0	Indonesia	TRUE		0	0
Sunda clouded leopard	15	625	4.04635	0	Indonesia	FALSE		0	0
Sunda clouded leopard	16	600	2.27485	0	Indonesia	FALSE		0	0
Sunda clouded leopard	17	575	3.39347	0.0434783	Indonesia	TRUE		0	0
Sunda clouded leopard	18	575	4.1031	0.565217	Indonesia	FALSE		0	0
Sunda clouded leopard	19	500	3.88724	0	Indonesia	TRUE		0	0
Sunda clouded leopard	20	475	2.71092	0	Indonesia	FALSE		0	0
Sunda clouded leopard	21	475	2.46711	0	Indonesia	FALSE		0	0
Sunda clouded leopard	22	450	3.2469	0	Indonesia	FALSE		0	0
Sunda clouded leopard	23	450	3.77314	1	Indonesia	FALSE		0	0
Sunda clouded leopard	24	425	4.23176	0	Indonesia	FALSE		0	0
Sunda clouded leopard	25	425	3.88334	0	Indonesia	FALSE		0	0
Tiger	1	494075	0.156754	0.0169003	Russian Federation	FALSE		0	4
Tiger	2	454725	0.117919	0.0091264	Russian Federation	FALSE		0	4
Tiger	3	128150	0.203366	0	China	FALSE		0	4
Tiger	4	48075	0.107109	0	Russian Federation	TRUE		0	4
Tiger	5	44400	0.499266	0.0259009	Russian Federation	FALSE	Sus scrofa	1	4
Tiger	6	40125	0.0819435	0	Russian Federation	FALSE		0	4
Tiger	7	33525	0.107541	0.00149142	Russian Federation	FALSE		0	4
Tiger	8	33275	0.0842277	0	Russian Federation	TRUE		0	4
Tiger	9	31350	0.108901	0.0271132	Russian Federation	TRUE		0	4
Tiger	10	23975	0.630049	0.0646507	Russian Federation	FALSE		0	4
Tiger	11	22675	0.146416	0	China	FALSE		0	4
Tiger	12	22400	0.357258	0	Russian Federation	FALSE		0	4
Tiger	13	21600	0.435967	0	Russian Federation	FALSE		0	4
Tiger	14	17650	0.200561	0	Russian Federation	TRUE		0	4
Tiger	15	17475	0.12325	0	Russian Federation	FALSE		0	4
Tiger	16	16575	0.24099	0	Russian Federation	TRUE		0	4
Tiger	17	15250	0.548525	0	Russian Federation	FALSE		0	4
Tiger	18	10150	0.217546	0.00246305	Russian Federation	TRUE		0	4
Tiger	19	9775	0.266798	0.173913	Russian Federation	TRUE		0	4
Tiger	20	8850	0.312668	0	Russian Federation	TRUE		0	4
Tiger	21	8775	0.22964	0	Russian Federation	TRUE		0	4
Tiger	22	8700	0.213749	0	Russian Federation	FALSE		0	4
Tiger	23	7400	0.209725	0	Russian Federation	TRUE		0	4
Tiger	24	7350	0.208798	0	Russian Federation	TRUE		0	4
Tiger	25	7000	0.211615	0	Russian Federation	TRUE		0	4

## Sheet: Tables S2 and S3 variables
Table	Variable	Description
Table S2	Species	species’ common name
	Protected area	protected area name
	IUCN Category	protected area category indicating level of protection
	Area (km2)	terrestrial area of the protected area
	Footprint	mean human footprint across the protected area
	% in low footprint	percentage of protected area within the bottom 10% of species’ lost range for human footprint
	Nearest PA (km)	distance to nearest category I-III protected area
	Country	primary country for the protected area
	Guild	if true, rewilding the species there would result in a complete large carnivore guild
	Prey	preferred prey species of the predator that are present in the protected area
	Number of prey	number of preferred prey species present in the protected area
	Total prey	total number of preferred prey species identified for the large carnivore
	Status	if available, specifies the status of the large carnivore in the protected area – i.e., whether it is present, absent, or its status is unknown; the top six largest PAs with status 'absent' or 'unknown' are highlighted in green
	Source	the source website for the status data
	Status notes	notes, if any, for the status entry
Table S3	Species	species’ common name
	Region ID	the area rank of the region
	Area (km2)	terrestrial area of the protected area
	Footprint	mean human footprint across the low footprint region
	% Protected	the percentage of the region overlapping category I-III protected areas
	Country	primary country for the protected area (based on the country that contains the greatest area of the low footprint region)
	Guild	if true, rewilding the species there would result in a complete large carnivore guild
	Prey	preferred prey species of the predator that are present in the protected area
	Number of prey	number of preferred prey species present in the protected area
	Total prey	total number of preferred prey species identified for the large carnivore
